# Supplementary material for: Diverse reactivity of a magnesium silanide toward ketones
Source: Royal Society of Chemistry journal article supplement (doi:10.1039/d2cc03966d), 2022-01-01
Supplement: d2cc03966d1.pdf [file d2cc03966d1.pdf]

Supporting Information for

## Diverse Reactivity of a Magnesium Silanide toward Ketones

Bibian Okokhere-Edeghoghon, Michael S. Hill,\* Mary F. Mahon and Claire L. M<sup>c</sup>Mullin\*

*Department of Chemistry, University of Bath, Claverton Down, Bath, BA2 7AY, United Kingdom.*

### General Experimental Details

All reactions of air- and moisture-sensitive compounds were carried out using standard Schlenk line and glovebox techniques under an inert atmosphere of argon. NMR experiments involving air-sensitive compounds were conducted in J. Young tap NMR tubes made up and sealed in a glovebox under argon. NMR spectra were recorded on a Bruker AV300 Ultrashield instrument for <sup>1</sup>H (300.2 MHz), a Bruker 400 Ultrashield instrument for <sup>29</sup>Si (79.5 MHz) or an Agilent ProPulse instrument for <sup>1</sup>H (500 MHz), <sup>13</sup>C (126 MHz) and <sup>29</sup>Si (99 MHz) spectra at room temperature. The <sup>1</sup>H/<sup>13</sup>C NMR spectra were referenced relative to residual solvent resonances, while <sup>29</sup>Si NMR spectra were referenced to an external standard (Me<sub>4</sub>Si). Solvents (toluene, pentane and hexane) were dried using an MBraun solvent purification system and stored over 4 Å molecular sieves under argon. THF for use in air- and moisture-sensitive reactions was dried over sodium or potassium/benzophenone and distilled before use. C<sub>6</sub>D<sub>6</sub> was purchased from Sigma-Aldrich and dried over a potassium mirror, vacuum transferred into a sealed ampoule and stored in a glovebox under argon. Di-*n*-butylmagnesium (Mgn-Bu<sub>2</sub> 1.0 M solution in *n*-heptane) and carbodiimides were purchased from Sigma-Aldrich and used without further purification. The β-diketiminato magnesium alkyl complex, [(BDI)MgnBu] (BDI = CH{C(Me)NDipp}<sub>2</sub>, Dipp = 2,6-*i*-Pr<sub>2</sub>C<sub>6</sub>H<sub>3</sub>), and dimethylphenylsilyl boronic acid pinacol ester (pinBSiMe<sub>2</sub>Ph, pin = pinacolato) were synthesised by literature procedures.<sup>1,2</sup> Elemental analysis was performed by Elemental Microanalysis, Okehampton, UK.

## Synthesis of compound 2.

A solution of [(BDI)Mgn-Bu] (50 mg, 0.10 mmol) and pinBSiMe<sub>2</sub>Ph (26 mg, 0.10 mmol) in C<sub>6</sub>D<sub>6</sub> (0.5 mL) was added via pipette to a J. Young NMR tube. Complete conversion to compound **1** was obtained after approximately 12 hours at room temperature. Acetophenone (20 mg, 0.10 mmol) was added to the reaction mixture and complete conversion to compound **2** was obtained after 10 minutes at room temperature. Crystals suitable for single crystal X-ray diffraction analysis of **2** were obtained by slow evaporation of a hexane/toluene solution at room temperature. <sup>1</sup>H NMR (500 MHz, C<sub>6</sub>D<sub>6</sub>) δ 7.67 – 7.60 (m, 1H, O-Ar), 7.35 – 7.20 (m, 4H, O-Ar), 7.10 (s, 2H, Dipp-Ar), 6.94 – 6.75 (m, 4H, Dipp-Ar), 5.01 (s, 1H, CH{C(CH<sub>3</sub>)NDipp}<sub>2</sub>), 4.04 (s, 2H, OCH<sub>2</sub>), 3.33 – 2.85 (m, 4H, Dipp-CH(CH<sub>3</sub>)<sub>2</sub>), 1.66 (s, 6H, CH{C(CH<sub>3</sub>)NDipp}<sub>2</sub>), 1.40 (s, 6H, Dipp-CH(CH<sub>3</sub>)<sub>2</sub>), 1.21 – 0.92 (m, 12H, Dipp-CH(CH<sub>3</sub>)<sub>2</sub>), 0.75 (s, 6H, Dipp-CH(CH<sub>3</sub>)<sub>2</sub>). <sup>13</sup>C NMR (126 MHz, C<sub>6</sub>D<sub>6</sub>) δ 170.2 (CH{C(CH<sub>3</sub>)NDipp}<sub>2</sub>), 160.4 (*i*, O Ar), 147.1 (*i*, Dipp Ar), 146.1 (C, Dipp Ar), 143.0 (C, Dipp Ar), 142.2 (C, Dipp Ar), 141.4 (C, Dipp Ar), 128.8 (CH, O Ar), 126.4 (CH, O Ar), 125.6 (CH, Dipp Ar), 123.9 (CH, Dipp Ar), 96.4 ({CH(CH<sub>3</sub>)NDipp}<sub>2</sub>), 91.6 (OCH), 32.0 (Dipp-CH(CH<sub>3</sub>)<sub>2</sub>), 28.5 (Dipp-CH(CH<sub>3</sub>)<sub>2</sub>), 24.9 (CH{C(CH<sub>3</sub>)NDipp}<sub>2</sub>), 24.5 (Dipp CH(CH<sub>3</sub>)<sub>2</sub>), 24.1 (Dipp CH(CH<sub>3</sub>)<sub>2</sub>), 23.1 (Dipp-CH(CH<sub>3</sub>)<sub>2</sub>) ppm. Elemental analysis, calculated for C<sub>63</sub>H<sub>68</sub>MgN<sub>2</sub>O<sub>2</sub>Si: C, 79.22; H, 8.92; N, 4.86 %. Found: C, 79.03; H, 8.78; N, 4.94 %.

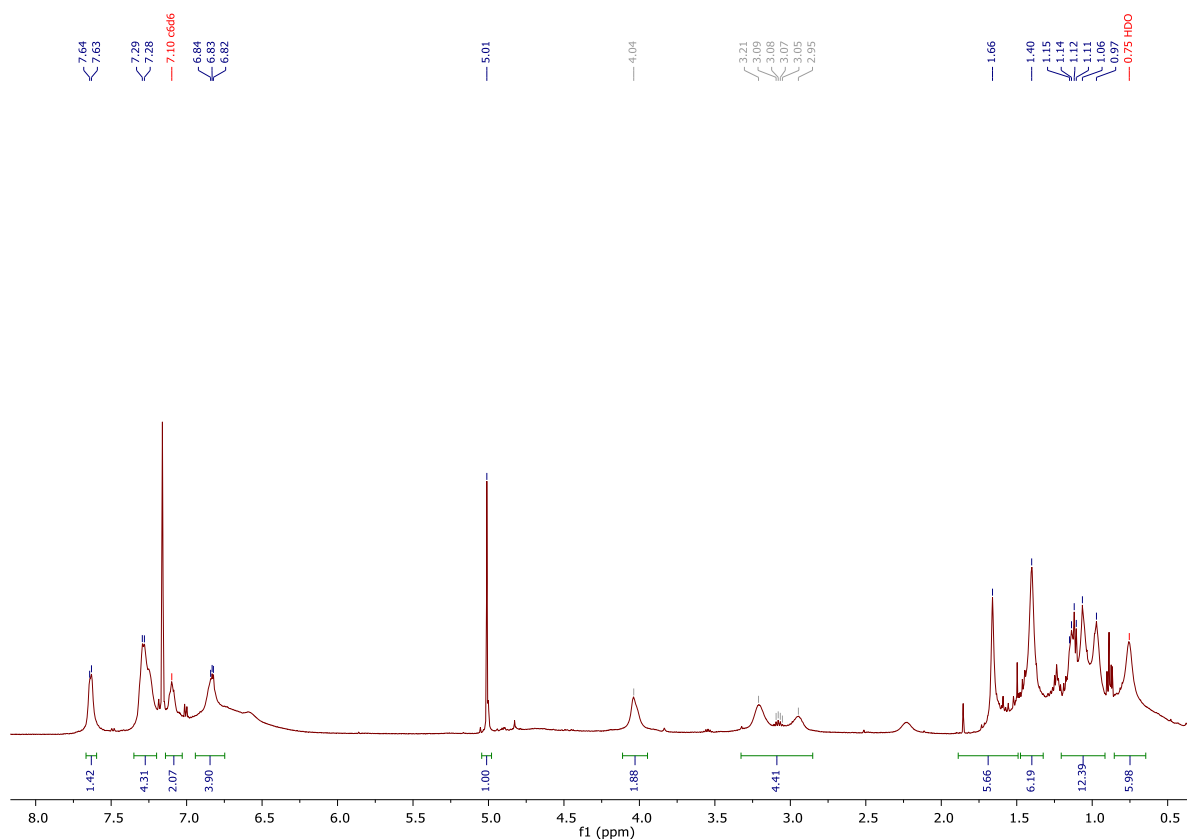

**Figure S1:** <sup>1</sup>H NMR spectrum (500 MHz, C<sub>6</sub>D<sub>6</sub>, 298 K) of compound **2**.

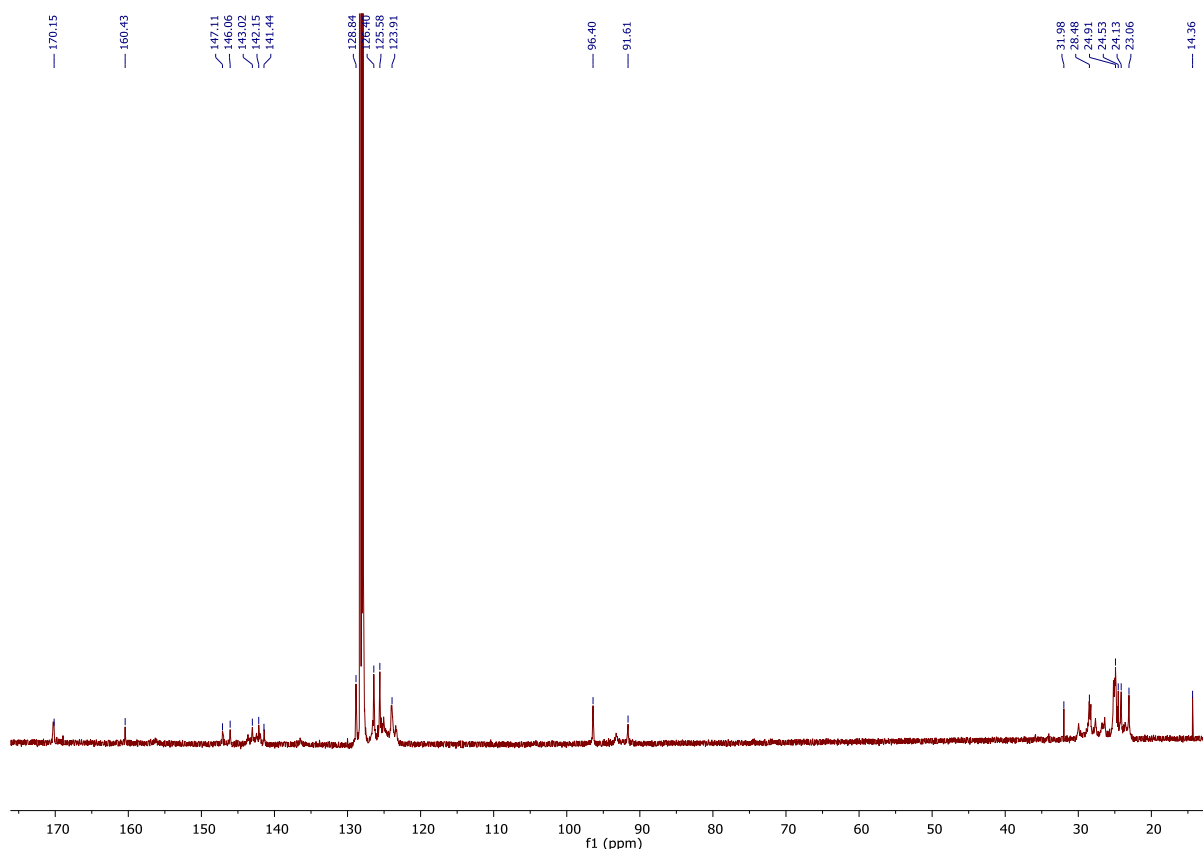

**Figure S2:**  $^{13}\text{C}\{^1\text{H}\}$  NMR spectrum (126 MHz,  $\text{C}_6\text{D}_6$ , 298 K) of compound **2**.

### Synthesis of compound **3**.

A solution of [(BDI)Mgn-Bu] (50 mg, 0.10 mmol) and pinBSiMe<sub>2</sub>Ph (26 mg, 0.10 mmol) in  $\text{C}_6\text{D}_6$  (0.5 mL) was added via pipette to a J. Young NMR tube. Complete conversion to compound **1** was obtained after approximately 12 hours at room temperature. Benzophenone (20 mg, 0.10 mmol) was added to the reaction mixture and complete conversion to compound **3** was obtained after immediately after reaction. Crystals suitable for single crystal X-ray diffraction analysis of **3** were obtained by cooling of hexane/toluene solution to  $-30\text{ }^\circ\text{C}$ .  $^1\text{H}$  NMR (500 MHz,  $\text{C}_6\text{D}_6$ )  $\delta$  7.31 (s, 3H,  $\text{C}_6\text{H}_5$ Si), 7.22 (d,  $J = 7.8$  Hz, 2H,  $\text{C}_6\text{H}_5$ Si), 7.04 (dd,  $J = 16.3, 7.3$  Hz, 6H, Dipp-Ar), 6.91 (d,  $J = 7.9$  Hz, 3H, C=O Ar), 5.80 (dd,  $J = 9.6, 5.2$  Hz, 1H, C=O Ar), 5.24 (dd,  $J = 9.7, 5.4$  Hz, 1H, C=O Ar), 5.11 (s, 1H,  $\text{CH}\{\text{C}(\text{CH}_3)\text{NDipp}\}_2$ ), 3.70 (d,  $J = 67.5$  Hz, 2H, Dipp- $\text{CH}(\text{CH}_3)_2$ ), 3.34 – 2.77 (m, 2H, Dipp- $\text{CH}(\text{CH}_3)_2$ ), 1.72 (s, 3H Dipp- $\text{CH}(\text{CH}_3)_2$ ), 1.67 (s, 6H,  $\text{CH}\{\text{C}(\text{CH}_3)\text{NDipp}\}_2$ ), 1.33 (d,  $J = 6.7$  Hz, 3H, Dipp- $\text{CH}(\text{CH}_3)_2$ ), 1.30 – 1.20 (m, 3H, Dipp- $\text{CH}(\text{CH}_3)_2$ ), 1.20 – 1.09 (m, 3H, Dipp- $\text{CH}(\text{CH}_3)_2$ ), 1.10 – 0.91 (m, 6H, Dipp- $\text{CH}(\text{CH}_3)_2$ ), 0.73 (d,  $J = 9.1$  Hz, 3H, Dipp- $\text{CH}(\text{CH}_3)_2$ ), 0.62 (s, 6H,  $\text{Si}(\text{CH}_3)_2\text{Ph}$ ), -0.03 (s, 3H, Dipp- $\text{CH}(\text{CH}_3)_2$ ) ppm.  $^{13}\text{C}$  NMR (126 MHz,  $\text{C}_6\text{D}_6$ )  $\delta$  169.5 ( $\text{CH}\{\text{C}(\text{CH}_3)\text{NDipp}\}_2$ ), 146.3 (*i*-Dipp-Ar), 140.7 (*i*- $\text{C}_6\text{H}_5$ Si), 134.9 (O=C), 132.6 (*i*-Dipp-Ar), 132.3 (*i*-Dipp-Ar), 125.8 ( $\text{Si}(\text{CH}_3)_2\text{Ph}$ ), 125.4 ( $\text{Si}(\text{CH}_3)_2\text{Ph}$ ), 124.5 (C(CH Dipp), 123.8 (CH Dipp Ar), 122.9 (CH O=CPh<sub>2</sub>), 115.5 (CH O=CPh<sub>2</sub>), 95.3 (s,  $\text{CH}\{\text{C}(\text{CH}_3)\text{NDipp}\}_2$ ), 32.0 (Dipp  $\text{CH}(\text{CH}_3)_2$ ), 28.9 (Dipp- $\text{CH}(\text{CH}_3)_2$ ), 25.0 (Dipp- $\text{CH}(\text{CH}_3)_2$ ), 24.7

(C(CH<sub>3</sub>)<sub>3</sub>), 24.6 (Dipp-CH(CH<sub>3</sub>)<sub>2</sub>), 24.6 ( Dipp-CH(CH<sub>3</sub>)<sub>2</sub>), 24.5 (Dipp-CH(CH<sub>3</sub>)<sub>2</sub>), 24.4 (Dipp-CH(CH<sub>3</sub>)<sub>2</sub>), 24.1 (Dipp-CH(CH<sub>3</sub>)<sub>2</sub>), 23.1 (Dipp-CH(CH<sub>3</sub>)<sub>2</sub>), 14.4 (Dipp-CH(CH<sub>3</sub>)<sub>2</sub>), -3.47 (Si(CH<sub>3</sub>)<sub>2</sub>Ph), -4.00 (Si(CH<sub>3</sub>)<sub>2</sub>Ph) ppm. <sup>29</sup>Si{<sup>1</sup>H} NMR (99 MHz, C<sub>6</sub>D<sub>6</sub>, 298K) δ -115.69 ppm. Elemental analysis, calculated for C<sub>50</sub>H<sub>62</sub>MgN<sub>2</sub>OSi: C, 79.08; H, 8.23; N, 3.69%. Found: C, 79.82; H, 7.82; N, 2.99%.

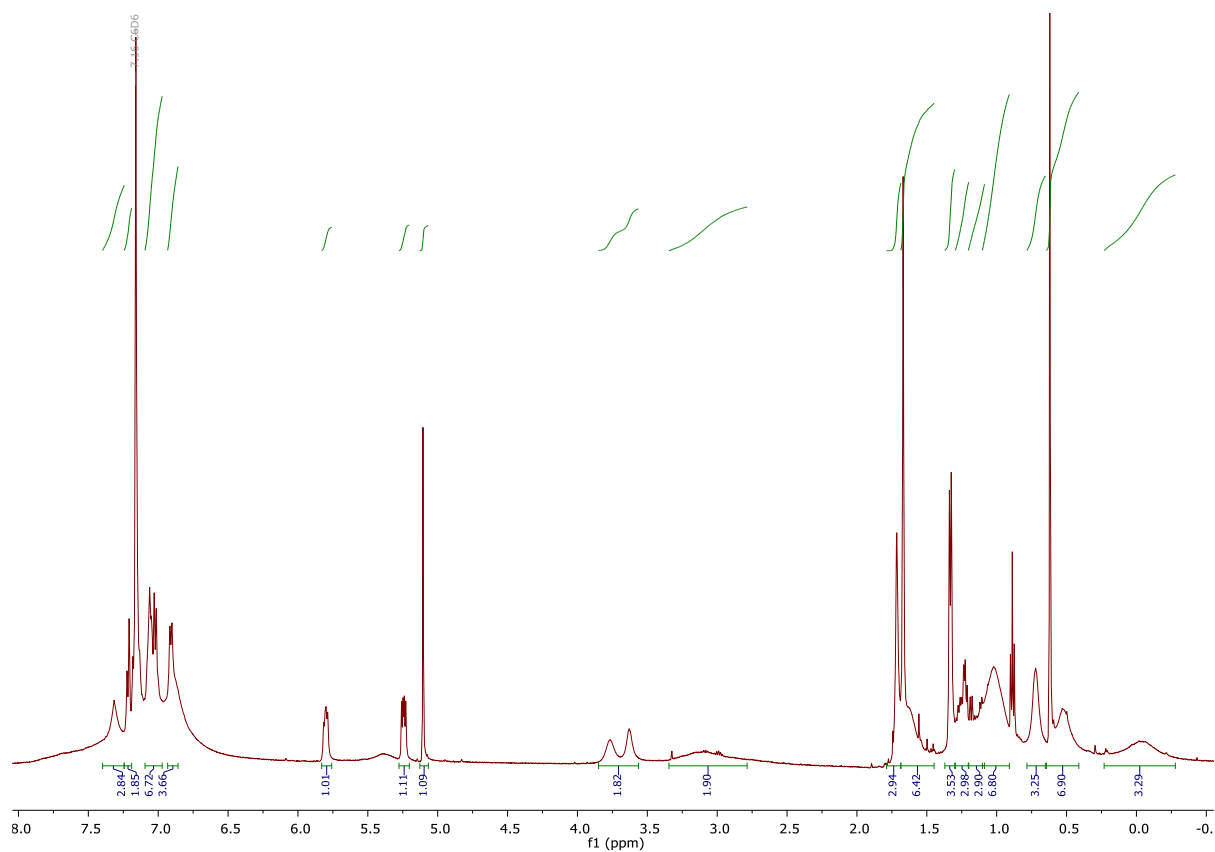

**Figure S3:** <sup>1</sup>H NMR spectrum (500 MHz, C<sub>6</sub>D<sub>6</sub>, 298 K) of compound **3**.

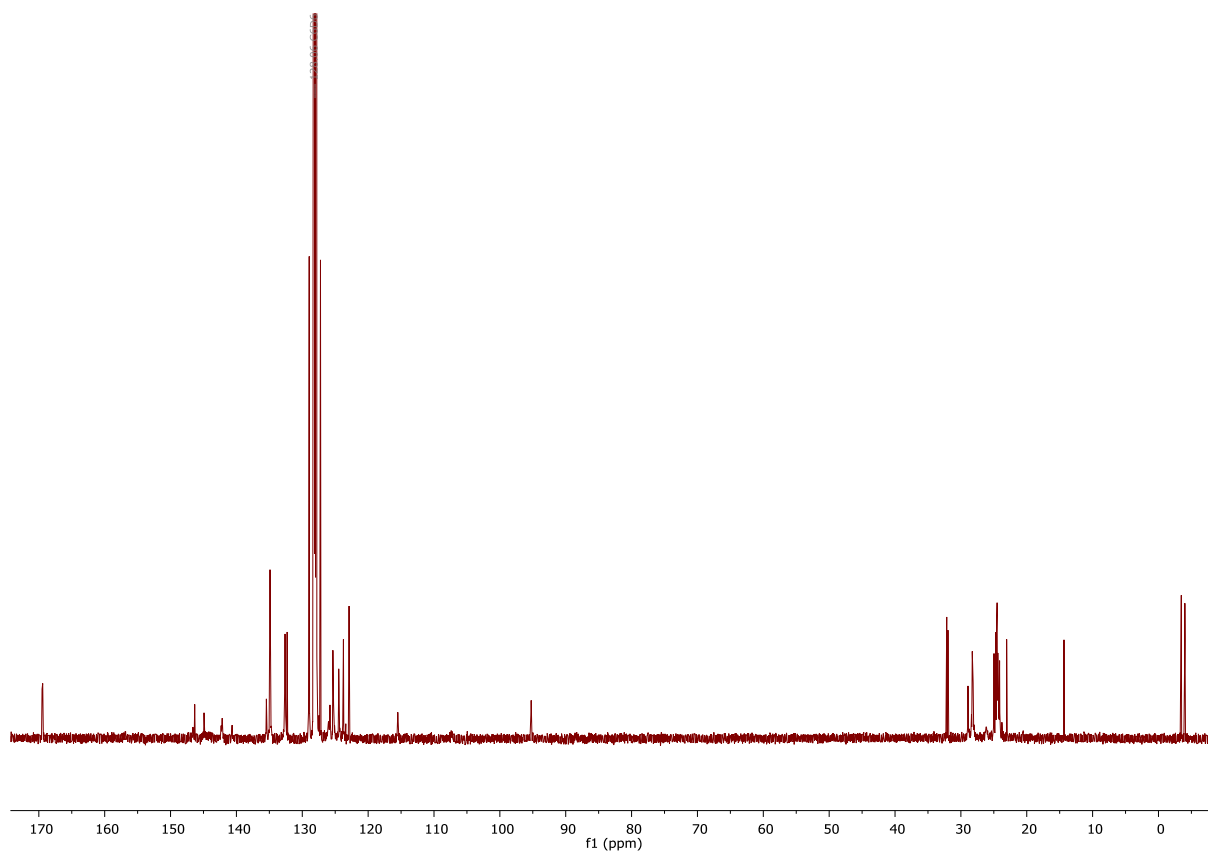

**Figure S4:**  $^{13}\text{C}\{^1\text{H}\}$  NMR spectrum (126 MHz,  $\text{C}_6\text{D}_6$ , 298 K) of compound **3**.

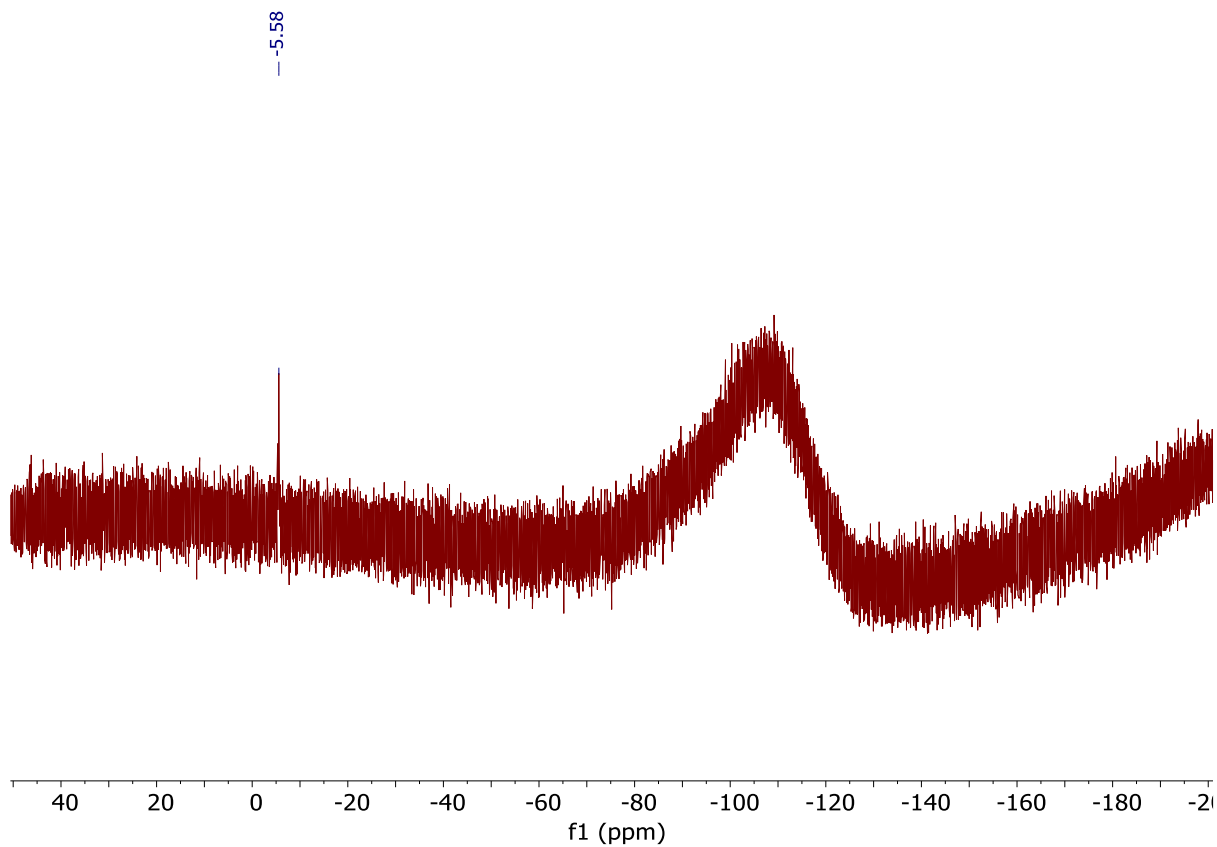

**Figure S5:**  $^{29}\text{Si}\{^1\text{H}\}$  NMR spectrum (99 MHz,  $\text{C}_6\text{D}_6$ , 298 K) of compound **3**.

## Synthesis of compound 4

A solution of [(BDI)Mg<sup>n</sup>-Bu] (50 mg, 0.10 mmol) and pinBSiMe<sub>2</sub>Ph (26 mg, 0.10 mmol) in C<sub>6</sub>D<sub>6</sub> (0.5 mL) was added via pipette to a J. Young NMR tube. Complete conversion to compound **1** was obtained after approximately 12 hours at room temperature. 4-fluorobenzophenone (20 mg, 0.10 mmol) was added to the reaction mixture and complete conversion to compound **4** was obtained after 48 hours at room temperature. Crystals suitable for single crystal X-ray diffraction analysis of **4** were obtained by slow evaporation of a hexane/ toluene solution at room temperature. <sup>1</sup>H NMR (500 MHz, Benzene-*d*<sub>6</sub>) δ 7.61 (s, 2H, CH, Ar), 7.43 – 7.30 (m, 2H, CH, Ar), 7.24 (s, 5H, Si-Ar), 7.10 (dd, *J* = 17.9, 5.6 Hz, 6H, Dipp-Ar), 7.01 (d, *J* = 7.3 Hz, 3H, CH, Ar), 6.96 (d, *J* = 7.2 Hz, 2H, CH, Ar), 6.94 – 6.86 (m, 3H, CH, Ar), 6.79 (d, *J* = 4.1 Hz, 2H, CH, Ar), 6.11 (s, 1H, CH, Ar), 5.16 – 5.08 (m, 2H, CH, Ar), 4.82 (s, 1H, CH{C(CH<sub>3</sub>)NDipp}<sub>2</sub>), 3.32 (s, 1H, CH-Si), 3.00 – 2.87 (m, 4H, Dipp-CH(CH<sub>3</sub>)<sub>2</sub>), 1.55 (s, 6H, CH{C(CH<sub>3</sub>)NDipp}<sub>2</sub>), 1.22 (d, *J* = 6.9 Hz, 3H, Dipp-CH(CH<sub>3</sub>)<sub>2</sub>), 1.18 (d, *J* = 7.0 Hz, 3H, Dipp-CH(CH<sub>3</sub>)<sub>2</sub>), 1.13 – 1.09 (m, 12H, Dipp-CH(CH<sub>3</sub>)<sub>2</sub>), 0.99 (q, *J* = 7.4, 7.0 Hz, 6H, Dipp-CH(CH<sub>3</sub>)<sub>2</sub>), 0.38 (s, 3H, Si(CH<sub>3</sub>)<sub>2</sub>Ph), 0.18 (s, 3H, Si(CH<sub>3</sub>)<sub>2</sub>Ph) ppm. <sup>13</sup>C NMR (126 MHz, Benzene-*d*<sub>6</sub>) δ 167.6 (s, CH{C(CH<sub>3</sub>)NDipp}<sub>2</sub>), 146.9 (C, Dipp), 141.6 (*i*, Dipp), 136.4 (*i*, Dipp), 135.1 (O, C-Ar), 134.3 (O, C-Ar), 127.4 (CH, Dipp Ar), 126.2 (CH, Ar), 124.7 (s, Si(CH<sub>3</sub>)<sub>2</sub>Ph), 124.6 (CH, Ar), 124.0 (CH, Ar), 123.4 (CH, Ar), 95.4 (s, CH{C(CH<sub>3</sub>)NDipp}<sub>2</sub>), 53.0 (s, CH{C(CH<sub>3</sub>)NDipp}<sub>2</sub>), 28.9 (s, Dipp CH(CH<sub>3</sub>)<sub>2</sub>), 28.4 (s, CH-Si), 24.4 (s, CH{C(CH<sub>3</sub>)NDipp}<sub>2</sub>), 23.8 (s, Dipp CH(CH<sub>3</sub>)<sub>2</sub>), 23.2 (s, Dipp CH(CH<sub>3</sub>)<sub>2</sub>), 23.1 (s, Dipp CH(CH<sub>3</sub>)<sub>2</sub>), 20.5 (s, Dipp CH(CH<sub>3</sub>)<sub>2</sub>), -4.2 (s, Si(CH<sub>3</sub>)<sub>2</sub>Ph) ppm. Elemental analysis, calculated for C<sub>63</sub>H<sub>68</sub>MgN<sub>2</sub>O<sub>2</sub>Si: C, 75.92; H, 7.05; N, 2.81 %. Found: C, 75.92; H, 7.99; N, 3.56 %.

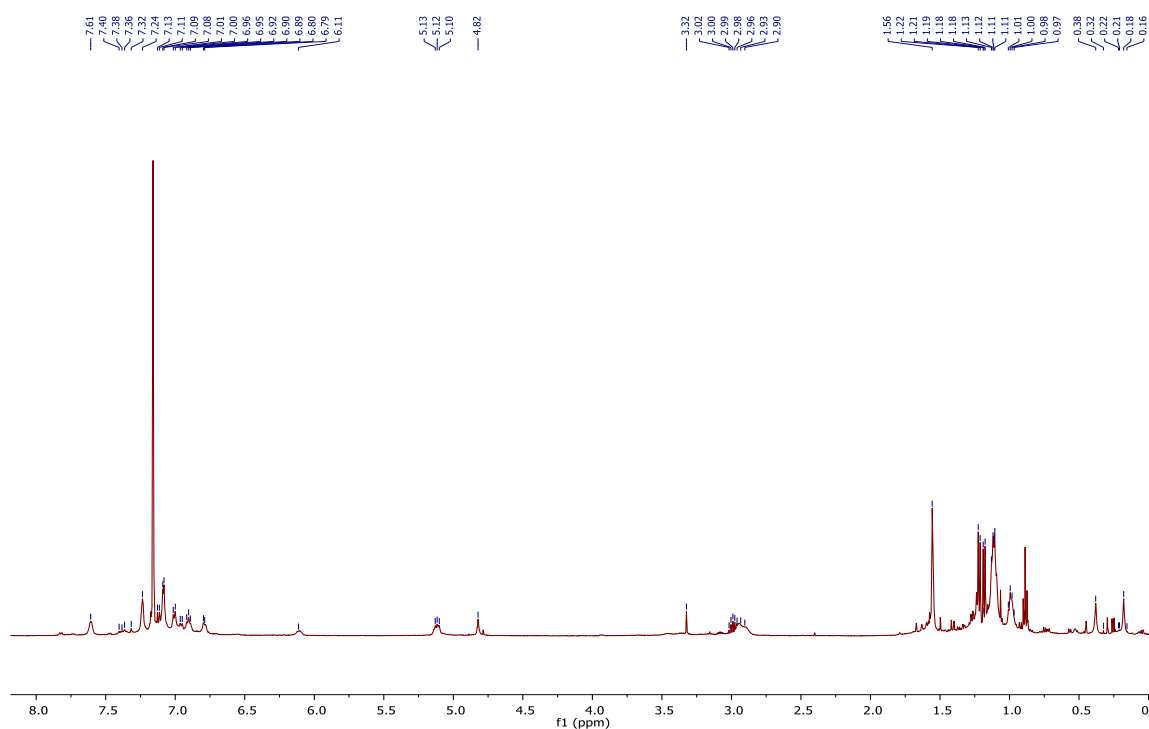

**Figure S6:** <sup>1</sup>H NMR spectrum (500 MHz, C<sub>6</sub>D<sub>6</sub>, 298 K) of compound **4**.

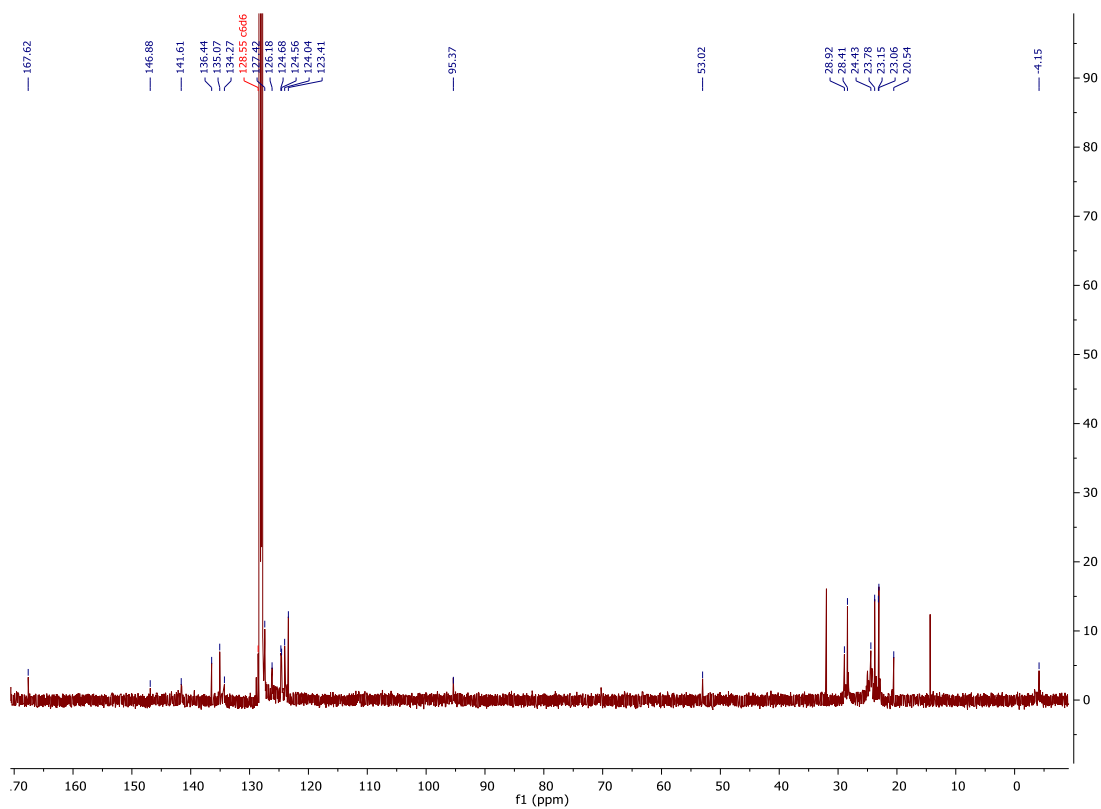

**Figure S7:**  $^{13}\text{C}\{^1\text{H}\}$  NMR spectrum (126 MHz,  $\text{C}_6\text{D}_6$ , 298 K) of compound **4**.

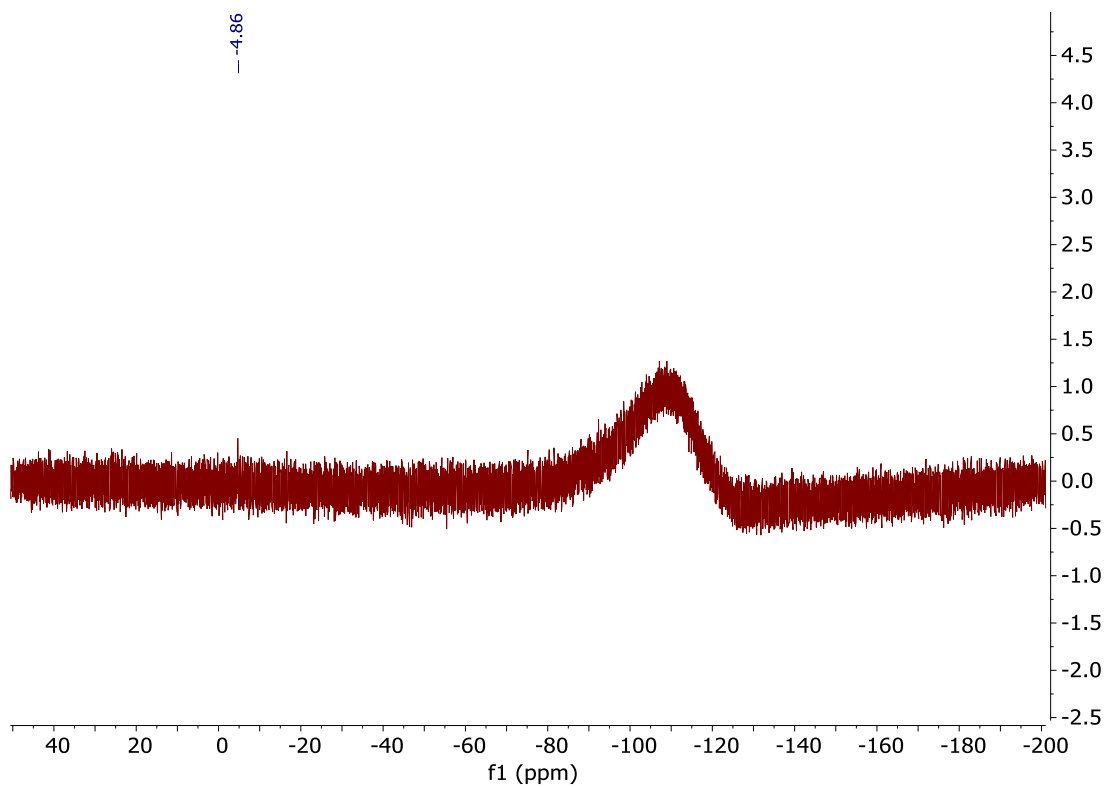

**Figure S8:**  $^{29}\text{Si}\{^1\text{H}\}$  NMR spectrum (99 MHz,  $\text{C}_6\text{D}_6$ , 298 K) of compound **4**.

### Synthesis of compound 5.

A solution [(BDI)Mg*n*-Bu] (50 mg, 0.10 mmol) and pinBSiMe<sub>2</sub>Ph (26 mg, 0.10 mmol) in C<sub>6</sub>D<sub>6</sub> (0.5 mL) was added via pipette to a J. Young NMR tube. Complete conversion to compound **1** was obtained after approximately 12 hours at room temperature. 9-fluorenone (20 mg, 0.10 mmol) was added to the reaction mixture and complete conversion to compound **5** was obtained after 48 hours at 60 °C. Crystals suitable for single crystal X-ray diffraction analysis of **5** were obtained by slow evaporation of a hexane/toluene solution at room temperature. <sup>1</sup>H NMR (400 MHz, C<sub>6</sub>D<sub>6</sub>) δ 9.18 (d, *J* = 4.9 Hz, 1H, Si(CH<sub>3</sub>)<sub>2</sub>Ph), 7.59 (d, *J* = 7.8 Hz, 1H, CH, Ar), 7.51 (dd, *J* = 13.1, 8.1 Hz, 3H, CH, Ar), 7.41 – 7.32 (m, 2H, CH, Ar), 7.22 – 7.17 (m, 4H, Si(CH<sub>3</sub>)<sub>2</sub>Ph), 7.15 – 7.14 (m, 6H, Dipp-Ar), 7.14 – 7.11 (m, 4H, CH, Ar), 6.95 (q, *J* = 7.5 Hz, 3H, CH, Ar), 6.83 (t, *J* = 7.4 Hz, 1H, CH, Ar), 6.64 (t, *J* = 8.0 Hz, 1H, CH, Ar), 6.56 (d, *J* = 8.7 Hz, 1H, CH, Ar), 4.54 (s, 1H, CH{C(CH<sub>3</sub>)NDipp}<sub>2</sub>), 3.45 – 2.73 (m, 4H, Dipp-CH(CH<sub>3</sub>)<sub>2</sub>), 1.63 (s, 6H, CH{C(CH<sub>3</sub>)NDipp}<sub>2</sub>), 1.35 – 0.84 (m, 24H, Dipp-CH(CH<sub>3</sub>)<sub>2</sub>), 0.14 (s, 6H, Si(CH<sub>3</sub>)<sub>2</sub>Ph) ppm. <sup>13</sup>C NMR (101 MHz, C<sub>6</sub>D<sub>6</sub>) δ 168.4 (s, CH{C(CH<sub>3</sub>)NDipp}<sub>2</sub>), 147.4 (s, *i*-(C<sub>6</sub>H<sub>5</sub>)Si), 145.8 (s, *i*-Dipp-Ar), 144.6 (*i*, O, Ar), 142.5 (C, Ar), 141.8 (C, Ar), 140.0 (C, Ar), 139.4 (C, Ar), 137.5 (CH, Ar), 133.8 (CH, Ar), 132.4 (s, Si(CH<sub>3</sub>)<sub>2</sub>Ph), 130.9 (CH, Ar), 129.9 CH, Ar), 129.0 (CH, Ar), 128.7 (s, Si(CH<sub>3</sub>)<sub>2</sub>Ph), 127.5 (CH Dipp Ar), 127.0 (CH, Ar), 126.0 (CH Dipp Ar), 125.1 (CH, Ar), 123.8 (CH, Ar), 123.1 (CH, Ar), 121.1 (CH, Ar), 97.6 (CH{C(CH<sub>3</sub>)NDipp}<sub>2</sub>), 70.7 (C, Ar) 24.8 (s, Dipp CH(CH<sub>3</sub>)<sub>2</sub>), 24.4 (CH{C(CH<sub>3</sub>)NDipp}<sub>2</sub>), 3.5 (Si(CH<sub>3</sub>)<sub>2</sub>Ph) ppm. <sup>29</sup>Si{H} NMR (99 MHz, C<sub>6</sub>D<sub>6</sub>, 298K) δ – 16.09 ppm. Elemental analysis, calculated for C<sub>63</sub>H<sub>68</sub>MgN<sub>2</sub>O<sub>2</sub>Si: C, 80.70; H, 7.31; N, 2.99 %. Found: C, 80.40; H, 7.26; N, 3.15 %.



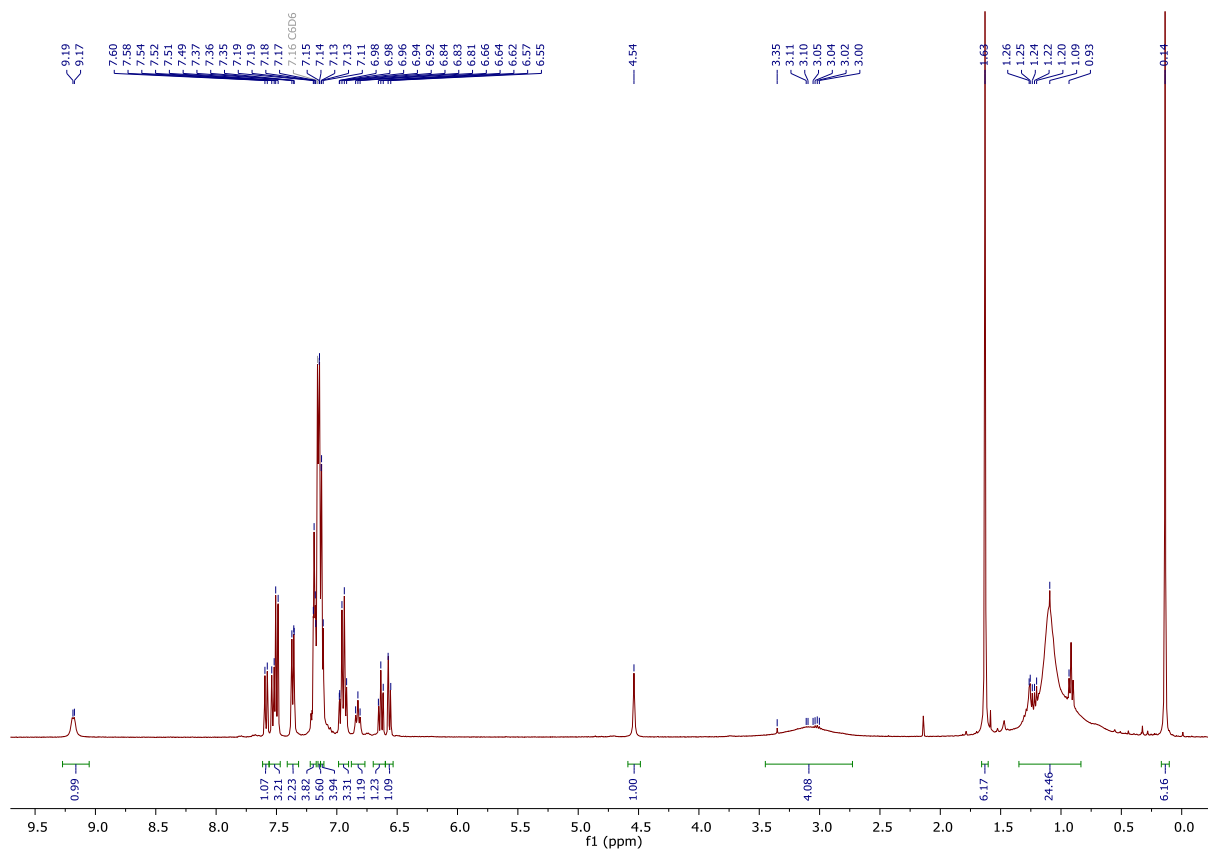

**Figure S9:**  $^1\text{H}$  NMR spectrum (400 MHz,  $\text{C}_6\text{D}_6$ , 298 K) of compound **5**.

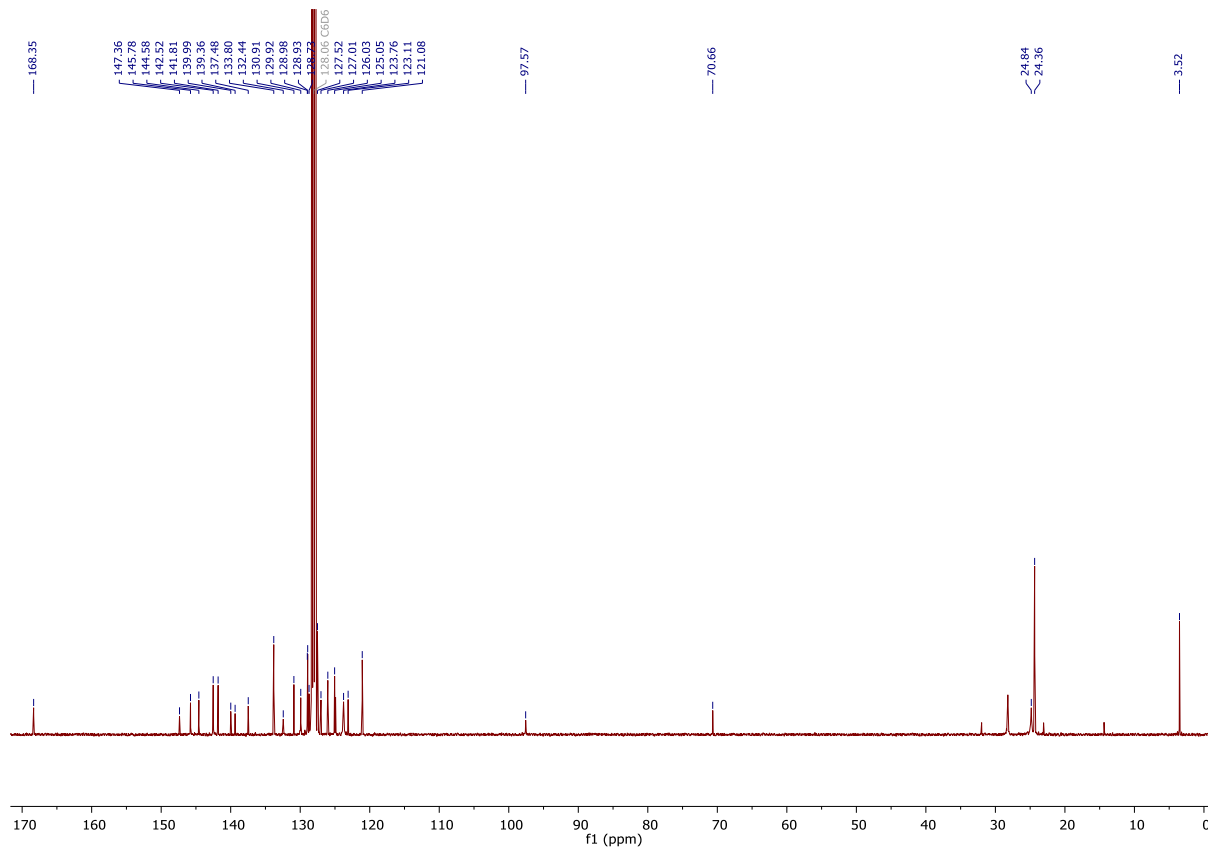

**Figure S10:**  $^{13}\text{C}\{^1\text{H}\}$  NMR spectrum (101 MHz,  $\text{C}_6\text{D}_6$ , 298 K) of compound **5**.

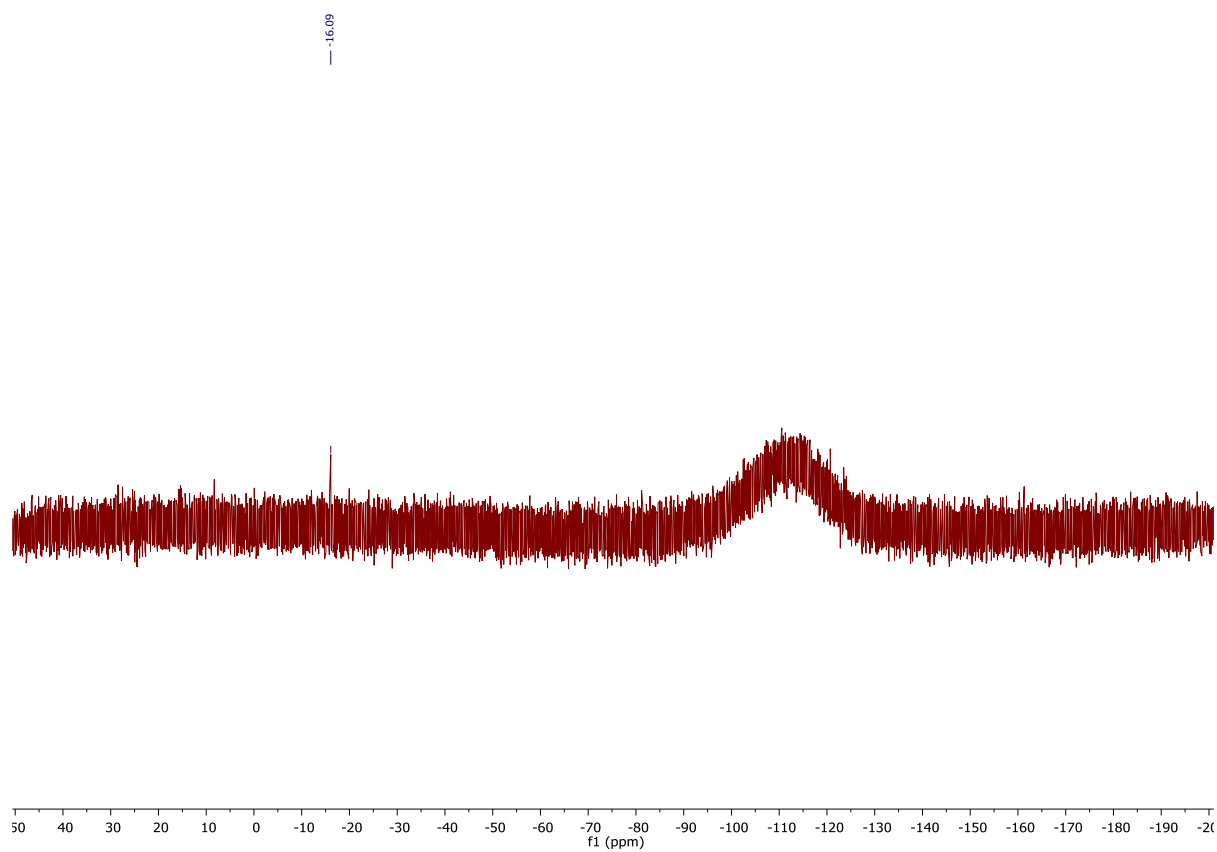

**Figure S11:**  $^{29}\text{Si}\{^1\text{H}\}$  NMR spectrum (99 MHz,  $\text{C}_6\text{D}_6$ , 298 K) of compound **5**.

### **Single crystal X-ray analysis of compounds 2 – 5.**

Data were collected for compounds **2 – 5** on a SuperNova, Dual Cu at zero, EosS2 diffractometer (CuK $\alpha$ ;  $\lambda = 1.54184 \text{ \AA}$ ), with the crystals maintained at 150 K during data collection. Using Olex2,<sup>3</sup> the structures were solved with ShelXT<sup>4</sup> and refined with the ShelXL<sup>5</sup> using Least Squares minimisation.

The asymmetric unit in the structure of **2** comprises half of a dimer molecule, the remainder of which is generated via an inversion centre that is proximate to the core of the complex. The hydrogen atoms attached to C31 were located and refined at a distance of 0.98 $\text{\AA}$  from the parent atom.

F1 was found to be disordered in the structure of **4**, such that it is present at 85% site-occupancy in the benzophenone ring based on C37, and 15% in the minor component of total ring disorder observed for the phenyl group based on C31. Distance and ADP restraints were applied to the latter moiety, to assist convergence.

**Table S1:** Single crystal X-ray diffraction analysis of compounds **2** – **5**.

| Compound                                                                       | <b>2</b>                                                            | <b>3</b>                                                           | <b>4</b>                                                                          | <b>5</b>                                                            |
|--------------------------------------------------------------------------------|---------------------------------------------------------------------|--------------------------------------------------------------------|-----------------------------------------------------------------------------------|---------------------------------------------------------------------|
| Empirical formula                                                              | C <sub>37</sub> H <sub>48</sub> MgN <sub>2</sub> O                  | C <sub>50</sub> H <sub>62</sub> MgN <sub>2</sub> OSi               | C <sub>63</sub> H <sub>70</sub> F <sub>2</sub> MgN <sub>2</sub> O <sub>2</sub> Si | C <sub>63</sub> H <sub>68</sub> MgN <sub>2</sub> O <sub>2</sub> Si  |
| Formula weight                                                                 | 561.08                                                              | 759.41                                                             | 977.61                                                                            | 937.59                                                              |
| Crystal system                                                                 | monoclinic                                                          | triclinic                                                          | monoclinic                                                                        | triclinic                                                           |
| Space group                                                                    | <i>P</i> 2 <sub>1</sub> / <i>n</i>                                  | <i>P</i> -1                                                        | <i>P</i> 2 <sub>1</sub> / <i>c</i>                                                | <i>P</i> -1                                                         |
| <i>a</i> /Å                                                                    | 14.3015(2)                                                          | 9.8330(3)                                                          | 19.7577(7)                                                                        | 11.7538(2)                                                          |
| <i>b</i> /Å                                                                    | 13.2978(1)                                                          | 10.8375(4)                                                         | 13.5109(3)                                                                        | 12.6949(3)                                                          |
| <i>c</i> /Å                                                                    | 17.4919(2)                                                          | 21.3220(8)                                                         | 22.2296(8)                                                                        | 17.8590(4)                                                          |
| $\alpha$ /°                                                                    | 90                                                                  | 95.428(3)                                                          | 90                                                                                | 90.407(2)                                                           |
| $\beta$ /°                                                                     | 97.0940(10)                                                         | 92.237(3)                                                          | 114.878(4)                                                                        | 96.484(2)                                                           |
| $\gamma$ /°                                                                    | 90                                                                  | 100.071(3)                                                         | 90                                                                                | 94.539(2)                                                           |
| <i>U</i> /Å <sup>3</sup>                                                       | 3301.12(6)                                                          | 2223.56(14)                                                        | 5383.4(3)                                                                         | 2639.10(10)                                                         |
| <i>Z</i>                                                                       | 4                                                                   | 2                                                                  | 4                                                                                 | 2                                                                   |
| $\rho_{\text{calc}}/\text{g cm}^{-3}$                                          | 1.129                                                               | 1.134                                                              | 1.206                                                                             | 1.180                                                               |
| $\mu/\text{mm}^{-1}$                                                           | 0.681                                                               | 0.878                                                              | 0.909                                                                             | 0.852                                                               |
| <i>F</i> (000)                                                                 | 1216.0                                                              | 820.0                                                              | 2088.0                                                                            | 1004.0                                                              |
| Crystal size/mm <sup>3</sup>                                                   | 0.336 × 0.131 × 0.092                                               | 0.12 × 0.049 × 0.015                                               | 0.127 × 0.077 × 0.062                                                             | 0.354 × 0.315 × 0.193                                               |
| 2 $\theta$ range for data collection/°                                         | 7.544 to 146.18                                                     | 8.33 to 146.476                                                    | 7.876 to 146.1                                                                    | 6.986 to 146.018                                                    |
| Index ranges                                                                   | -17 ≤ <i>h</i> ≤ 17,<br>-10 ≤ <i>k</i> ≤ 16,<br>-21 ≤ <i>l</i> ≤ 21 | -12 ≤ <i>h</i> ≤ 9,<br>-12 ≤ <i>k</i> ≤ 13,<br>-26 ≤ <i>l</i> ≤ 26 | -16 ≤ <i>h</i> ≤ 24,<br>-16 ≤ <i>k</i> ≤ 16,<br>-27 ≤ <i>l</i> ≤ 17               | -14 ≤ <i>h</i> ≤ 14,<br>-15 ≤ <i>k</i> ≤ 15,<br>-22 ≤ <i>l</i> ≤ 22 |
| Reflections collected                                                          | 43998                                                               | 27279                                                              | 38292                                                                             | 47411                                                               |
| Independent reflections, <i>R</i> <sub>int</sub>                               | 6598, 0.0486                                                        | 8885, 0.0515                                                       | 10654, 0.0597                                                                     | 10465, 0.0334                                                       |
| Data/restraints/parameters                                                     | 6598/2/388                                                          | 8885/0/508                                                         | 10654/186/691                                                                     | 10465/0/634                                                         |
| Goodness-of-fit on <i>F</i> <sup>2</sup>                                       | 1.038                                                               | 1.022                                                              | 1.021                                                                             | 1.020                                                               |
| Final <i>R</i> 1, <i>wR</i> <sub>2</sub> [ <i>I</i> > 2 $\sigma$ ( <i>I</i> )] | 0.0438, 0.1138                                                      | 0.0443, 0.1054                                                     | 0.0604, 0.1544                                                                    | 0.0394, 0.0992                                                      |
| Final <i>R</i> 1, <i>wR</i> <sub>2</sub> [all data]                            | 0.0523, 0.1189                                                      | 0.0590, 0.1124                                                     | 0.0926, 0.1750                                                                    | 0.0437, 0.1023                                                      |
| Largest diff. peak/hole/e Å <sup>-3</sup>                                      | 0.26/-0.22                                                          | 0.43/-0.24                                                         | 1.62/-0.52                                                                        | 0.28/-0.41                                                          |

## Computational Details / Methodology

DFT calculations were run with Gaussian 16 (C.01)<sup>6</sup> using the BP86 functional.<sup>7,8</sup> The Mg and Si centres were described with the Stuttgart RECPs and associated basis sets,<sup>9</sup> and 6-31G\*\* basis sets were used for all other atoms (BS1).<sup>10, 11</sup> A polarization function was also added to Si ( $\zeta_d = 0.284$ ). Initial BP86 optimizations were performed using the ‘grid = ultrafine’ option, with all stationary points being fully characterized via analytical frequency calculations as either minima (all positive eigenvalues) or transition states (one negative eigenvalue). IRC calculations and subsequent geometry optimizations were used to confirm the minima linked by each transition state. All energies were recomputed with a larger basis set (BS2) featuring 6-311++G\*\* on all atoms. Corrections for the effect of benzene ( $\epsilon = 2.2706$ ) solvent were run using the polarizable continuum model and BS1.<sup>12</sup> Single-point dispersion corrections to the BP86 results employed Grimme’s D3 parameter set with Becke-Johnson damping as implemented in Gaussian.<sup>13</sup>

## Breakdown of Energy Contributions

The following tables detail the evolution of the relative energies as the successive corrections to the initial SCF energy are included. Terms used are:

|                         |                                                                                   |
|-------------------------|-----------------------------------------------------------------------------------|
| $\Delta E_{BS1}$        | SCF energy computed with the BP86 functional with BS1                             |
| $\Delta H_{BS1}$        | Enthalpy at 0 K with BS1                                                          |
| $\Delta G_{BS1}$        | Free energy at 298.15 K and 1 atm with BS1                                        |
| $\Delta G_{BS1/bnz}$    | Free energy corrected for benzene solvent with BS1                                |
| $\Delta G_{BS1/bnz+D3}$ | Free energy corrected for benzene and dispersion effects with BS1                 |
| $\Delta G_{bnz}$        | Free energy corrected for basis set (BS2), dispersion effects and benzene solvent |

In each case the final data used in the main article are highlighted in bold.

**Table S2:** Relative energies (in kcal mol<sup>-1</sup>) for computed structures. Data in bold are those used in the main text. All energies are quoted relative to **1** and the associated ketone at 0.0 kcal mol<sup>-1</sup>.

|                 | $\Delta E_{BS1}$ | $\Delta H_{BS1}$ | $\Delta G_{BS1}$ | $\Delta G_{BS1/bnz}$ | $\Delta G_{BS1/bnz+D3}$ | $\Delta E_{BS2}$ | $\Delta G_{bnz}$ |
|-----------------|------------------|------------------|------------------|----------------------|-------------------------|------------------|------------------|
| <b>1</b>        | 0.0              | 0.0              | 0.0              | 0.0                  | 0.0                     | 0.0              | <b>0.0</b>       |
| <b>2</b>        | -23.0            | -23.0            | -10.7            | -7.3                 | -35.8                   | -20.2            | <b>-33.0</b>     |
| <b>3</b>        | -9.4             | -8.4             | 7.3              | 9.7                  | -13.3                   | -5.8             | <b>-10.2</b>     |
| <b>4</b>        | -28.5            | -27.1            | 2.3              | 6.6                  | -41.6                   | -24.3            | <b>-37.3</b>     |
| <b>5</b>        | -76.5            | -74.6            | -44.1            | -40.1                | -84.0                   | -74.2            | <b>-81.8</b>     |
| <b>4''</b>      | -28.2            | -26.5            | 4.2              | 8.8                  | -39.2                   | -22.5            | <b>-33.5</b>     |
| <b>A</b>        | -7.4             | -6.8             | 7.7              | 9.5                  | -14.9                   | -4.3             | <b>-11.7</b>     |
| <b>B</b>        | -3.7             | -2.7             | 13.6             | 16.6                 | -11.2                   | -0.9             | <b>-8.4</b>      |
| <b>TS(B-C)</b>  | 11.0             | 11.9             | 30.3             | 32.9                 | 2.1                     | 13.1             | <b>4.2</b>       |
| <b>C</b>        | -10.4            | -10.0            | 3.9              | 3.7                  | -12.9                   | -10.4            | <b>-12.8</b>     |
| <b>B'</b>       | -3.3             | -2.0             | 14.8             | 17.6                 | -9.6                    | -0.3             | <b>-7.0</b>      |
| <b>TS(B-C)'</b> | 12.2             | 13.0             | 31.1             | 33.8                 | 3.3                     | 14.6             | <b>5.7</b>       |
| <b>C'</b>       | -8.8             | -8.4             | 4.9              | 4.7                  | -11.8                   | -8.6             | <b>-11.6</b>     |
| <b>4'</b>       | -28.2            | -26.8            | 2.7              | 7.1                  | -41.0                   | -23.5            | <b>-36.3</b>     |

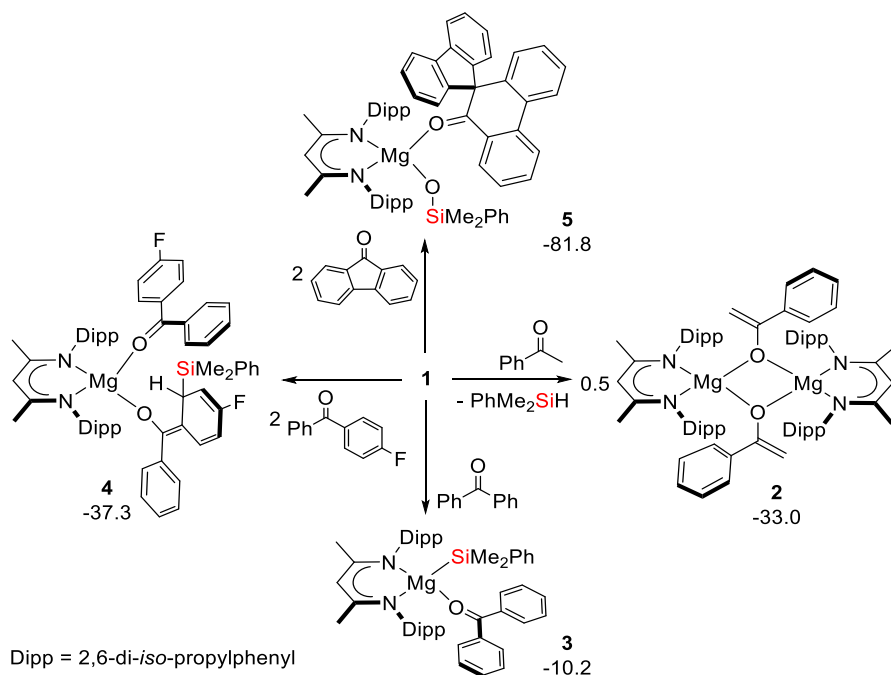

**Scheme S1:** Synthesis of compounds **2** – **5** with DFT calculated free energies (BP86-D3(BJ)-benzene/BS2//BP86/BS1, in kcal mol<sup>-1</sup>) for the reaction of **1** with the associated ketone



An alternative pathway (denoted by ') for silylation at the *ortho* position of the non-fluorinated aryl group was also computed and is shown in Figure S13. The overall barrier is 17.4 kcal mol<sup>-1</sup> to give 4' at -36.3 kcal mol<sup>-1</sup>. The equivalent silylation product for the ketone benzophenone, 4'', is also shown in Figure S13 at -33.5 kcal mol<sup>-1</sup>.

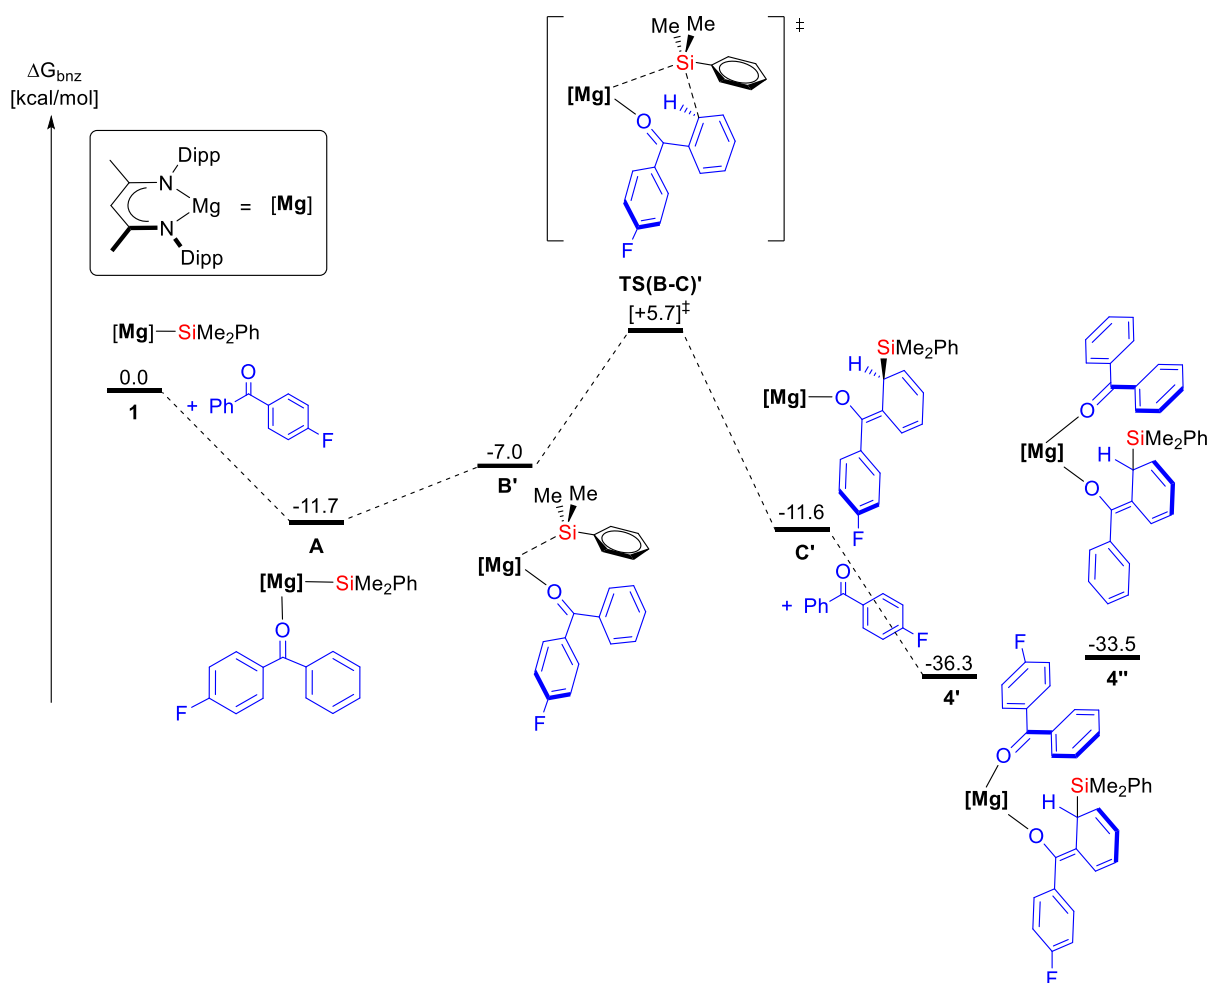

**Figure S13:** DFT calculated free energy profile (BP86-D3(BJ)-benzene/BS2//BP86/BS1, in kcal mol<sup>-1</sup>) for the reaction of 1 with PhC(O)(C<sub>6</sub>H<sub>4</sub>-*p*-F) to form 4'. Computed structure 4'' also shown.



## References

1. A. P. Dove, V. C. Gibson, P. Hornmrun, E. L. Marshall, J. A. Segal, A. J. P. White and D. J. Williams, *Dalton Trans.*, 2003, 3088-3097.
2. M. Suginome, T. Matsuda and Y. Ito, *Organometallics*, 2000, **19**, 4647-4649.
3. O. V. Dolomanov, L. J. Bourhis, R. J. Gildea, J. A. K. Howard, H. Puschmann, *J. Appl. Cryst.* 2009, **42**, 339-341.
4. L. J. Bourhis, O. V. Dolomanov, R. J. Gildea, J. A. K. Howard, H. Puschmann, *Acta Cryst. a- Foundation and Advances*, 2015, **71**, 59-75.
5. G. M. Sheldrick, *Acta Cryst. Sect. C-Structural Chemistry*, 2015, **71**, 3-8.
6. M. J. Frisch, G. W. Trucks, H. B. Schlegel, G. E. Scuseria, M. A. Robb, J. R. Cheeseman, G. Scalmani, V. Barone, G. A. Petersson, H. Nakatsuji, X. Li, M. Caricato, A. V. Marenich, J. Bloino, B. G. Janesko, R. Gomperts, B. Mennucci, H. P. Hratchian, J. V. Ortiz, A. F. Izmaylov, J. L. Sonnenberg, Williams, F. Ding, F. Lipparini, F. Egidi, J. Goings, B. Peng, A. Petrone, T. Henderson, D. Ranasinghe, V. G. Zakrzewski, J. Gao, N. Rega, G. Zheng, W. Liang, M. Hada, M. Ehara, K. Toyota, R. Fukuda, J. Hasegawa, M. Ishida, T. Nakajima, Y. Honda, O. Kitao, H. Nakai, T. Vreven, K. Throssell, J. A. Montgomery Jr., J. E. Peralta, F. Ogliaro, M. J. Bearpark, J. J. Heyd, E. N. Brothers, K. N. Kudin, V. N. Staroverov, T. A. Keith, R. Kobayashi, J. Normand, K. Raghavachari, A. P. Rendell, J. C. Burant, S. S. Iyengar, J. Tomasi, M. Cossi, J. M. Millam, M. Klene, C. Adamo, R. Cammi, J. W. Ochterski, R. L. Martin, K. Morokuma, O. Farkas, J. B. Foresman, D. J. Fox, Wallingford, CT, 2016.
7. A. D. Becke, *Physical Review A* 1988, **38** (6), 3098-3100.
8. J. P. Perdew, *Physical Review B* 1986, **33** (12), 8822-8824.
9. D. Andrae, U. Häußermann, M. Dolg, H. Stoll, H. Preuß, *Theoretica Chimica Acta* 1990, **77** (2), 123-141.
10. P. C. Hariharan, J. A. Pople, *Theoretica Chimica Acta* 1973, **28** (3), 213-222.
11. W. J. Hehre, R. Ditchfield, J. A. Pople, *The Journal of Chemical Physics* 1972, **56** (5), 2257-2261.
12. J. Tomasi, B. Mennucci, R. Cammi, *R. Chem. Rev.* 2005, **105**, 2999-3094.
13. S. Grimme, S. Ehrlich, L. Goerigk *J. Comp. Chem.* 2011, **32**, 1456-1465.

## Cartesian Coordinates and Computed Energies (in Hartrees)

### **PhC(=O)Me**

SCF (BP86) Energy = -384.890526431  
Enthalpy 0K = -384.756555  
Enthalpy 298K = -384.747565  
Free Energy 298K = -384.789429  
Lowest Frequency = 66.9213 cm<sup>-1</sup>  
Second Frequency = 147.5339 cm<sup>-1</sup>  
SCF (BP86-D3BJ) Energy = -384.917634508  
SCF (C6H6) Energy = -384.893162211  
SCF (BS2) Energy = -384.992020751

O -2.22489 -1.32130 0.00102  
C -1.70555 -0.20199 0.00018  
C -2.56866 1.05579 -0.00090  
H -3.62603 0.75736 -0.00055  
H -2.36407 1.67976 0.88707  
H -2.36418 1.67799 -0.89016  
C -0.20839 -0.05102 0.00006  
C 0.43589 1.20516 0.00049  
C 0.57525 -1.22615 -0.00044  
C 1.83653 1.28319 0.00044  
H -0.15431 2.12701 0.00091  
C 1.97192 -1.14819 -0.00051  
H 0.05162 -2.18715 -0.00073  
C 2.60573 0.10791 -0.00006  
H 2.32880 2.26128 0.00080  
H 2.57185 -2.06433 -0.00088  
H 3.69917 0.17027 -0.00009

### **PhC(=O)Ph**

SCF (BP86) Energy = -576.623309768  
Enthalpy 0K = -576.437366  
Enthalpy 298K = -576.425337  
Free Energy 298K = -576.475232  
Lowest Frequency = 42.1834 cm<sup>-1</sup>  
Second Frequency = 64.3203 cm<sup>-1</sup>  
SCF (BP86-D3BJ) Energy = -576.670272879  
SCF (C6H6) Energy = -576.626243261  
SCF (BS2) Energy = -576.769376102

C 3.83941 -0.89879 -0.11835  
C 2.71931 -1.55016 -0.65916  
C 1.45644 -0.94021 -0.60625  
C 1.30630 0.33687 -0.02143  
C 2.44557 0.99589 0.49252  
C 3.69992 0.37719 0.45782  
H 4.82241 -1.38047 -0.15241  
H 2.82915 -2.53389 -1.12745  
H 0.58975 -1.44215 -1.04698  
H 2.31530 1.99815 0.91192  
H 4.57412 0.88947 0.87317  
C -0.00001 1.08399 -0.00013  
C -1.30631 0.33684 0.02136  
C -1.45633 -0.94036 0.60596  
C -2.44569 0.99594 -0.49225  
C -2.71918 -1.55033 0.65899  
H -0.58955 -1.44238 1.04642  
C -3.70003 0.37723 -0.45742  
H -2.31549 1.99826 -0.91151  
C -3.83940 -0.89885 0.11854  
H -2.82893 -2.53416 1.12709  
H -4.57430 0.88960 -0.87250  
H -4.82239 -1.38055 0.15270  
O -0.00002 2.32332 -0.00022

### **PhC(=O)(C<sub>6</sub>H<sub>4</sub>-p-F)**

SCF (BP86) Energy = -675.857861063  
Enthalpy 0K = -675.679917  
Enthalpy 298K = -675.667041  
Free Energy 298K = -675.719054  
Lowest Frequency = 39.9924 cm<sup>-1</sup>  
Second Frequency = 60.9980 cm<sup>-1</sup>  
SCF (BP86-D3BJ) Energy = -675.905169535  
SCF (C6H6) Energy = -675.860736904  
SCF (BS2) Energy = -676.041298969

C 0.47950 1.16134 -0.01374  
O 0.57594 2.39736 -0.01474  
C -0.87852 0.51861 -0.00193  
C -1.12996 -0.76034 0.54463  
C -1.96694 1.28302 -0.48233  
C -2.43265 -1.27513 0.59466  
H -0.30637 -1.34659 0.96233  
C -3.26873 0.77668 -0.45798  
H -1.76024 2.28468 -0.87069  
C -3.48015 -0.50054 0.08205  
H -2.64736 -2.25569 1.02778  
H -4.11863 1.34884 -0.83985  
C 1.72444 0.31581 -0.02341  
C 1.78920 -0.95818 -0.63039  
C 2.89965 0.87615 0.52536  
C 3.00250 -1.66249 -0.67001  
H 0.89738 -1.38325 -1.10108  
C 4.10335 0.16327 0.50389  
H 2.83832 1.87800 0.96109  
C 4.15716 -1.10920 -0.09384  
H 3.04691 -2.64269 -1.15609  
H 5.00504 0.59944 0.94639  
H 5.10087 -1.66437 -0.11757  
F -4.73961 -0.99681 0.11599

### **fluorene**

SCF (BP86) Energy = -575.430864630  
Enthalpy 0K = -575.266181  
Enthalpy 298K = -575.255330  
Free Energy 298K = -575.301574  
Lowest Frequency = 94.8673 cm<sup>-1</sup>  
Second Frequency = 126.1437 cm<sup>-1</sup>  
SCF (BP86-D3BJ) Energy = -575.477105157  
SCF (C6H6) Energy = -575.433882746  
SCF (BS2) Energy = -575.574206025

C 3.04675 -1.40176 -0.00017  
C 3.48598 -0.06565 -0.00019  
C 2.55169 0.98936 -0.00011  
C 1.19358 0.66990 -0.00001  
C 0.74333 -0.67616 -0.00000  
C 1.67214 -1.72215 -0.00008  
H 3.78460 -2.21108 -0.00023  
H 4.55860 0.15296 -0.00026  
H 2.86851 2.03752 -0.00011  
H 1.35143 -2.76933 -0.00007  
C -0.00001 1.58610 0.00013  
C -1.19376 0.66980 0.00009  
C -2.55180 0.98954 0.00010  
C -3.48609 -0.06553 0.00010  
C -3.04680 -1.40159 0.00008  
C -1.67217 -1.72210 0.00006  
C -0.74330 -0.67616 0.00006

H -2.86852 2.03771 0.00012  
H -4.55875 0.15289 0.00012  
H -3.78474 -2.21084 0.00008  
H -1.35161 -2.76930 0.00003  
O 0.00040 2.81723 -0.00001

### 1

SCF (BP86) Energy = -1555.60305410  
Enthalpy 0K = -1554.823872  
Enthalpy 298K = -1554.773580  
Free Energy 298K = -1554.911662  
Lowest Frequency = 6.5296 cm<sup>-1</sup>  
Second Frequency = 14.6959 cm<sup>-1</sup>  
SCF (BP86-D3BJ) Energy = -1555.83016688  
SCF (C6H6) Energy = -1555.61047988  
SCF (BS2) Energy = -2040.84309061

Si -0.17412 1.83588 -1.84437  
Mg 0.21019 -0.19758 -0.21665  
N -0.94280 -1.66299 0.67376  
N 1.96018 -0.88947 0.64007  
C -2.36150 -1.60791 0.41456  
C 2.03531 -1.97026 1.44467  
C -3.19929 -0.81621 1.25287  
C -4.26042 -2.09097 -1.03284  
H -4.67971 -2.58621 -1.91609  
C -0.45004 -2.63178 1.47409  
C 0.91994 -2.76315 1.81075  
H 1.15182 -3.60543 2.46668  
C -2.89540 -2.26420 -0.73217  
C 3.15599 -0.14078 0.34043  
C 3.51132 0.97363 1.15452  
C -1.49956 3.07004 -1.18394  
C -4.55715 -0.67624 0.90692  
H -5.20776 -0.06232 1.53979  
C -2.02776 -3.13864 -1.64092  
H -1.03463 -3.22721 -1.16600  
C -5.08945 -1.30109 -0.22723  
H -6.14776 -1.17670 -0.47999  
C 4.61600 1.76052 0.77520  
H 4.89386 2.62312 1.39137  
C 3.38421 -2.38436 2.01138  
H 4.10717 -2.58157 1.20152  
H 3.29810 -3.28604 2.63487  
H 3.81800 -1.57366 2.62168  
C -3.86018 3.67170 -0.82017  
H -4.92216 3.42181 -0.92612  
C -2.66186 -0.11288 2.50182  
H -1.62099 -0.45071 2.65054  
C -1.40035 -3.65806 2.07033  
H -2.16336 -3.16654 2.69793  
H -0.86194 -4.39478 2.68392  
H -1.95034 -4.19217 1.27694  
C -2.88247 2.78060 -1.28994  
H -3.20605 1.83953 -1.75206  
C 3.55777 -1.64567 -1.72046  
H 2.76173 -2.21783 -1.21204  
C 3.91472 -0.45798 -0.82324  
C 2.71452 1.34327 2.40822  
H 1.99519 0.52707 2.59708  
C 4.75294 -2.60162 -1.93332  
H 5.57448 -2.11087 -2.48400  
H 4.44120 -3.48241 -2.52134  
H 5.16387 -2.96042 -0.97425  
C -1.14320 4.29593 -0.57183  
H -0.08461 4.56563 -0.47685  
C -2.63555 1.42179 2.31956  
H -2.03912 1.72486 1.44217

H -2.21050 1.91176 3.21340  
H -3.65255 1.82251 2.16708  
C -1.82630 -2.48392 -3.02651  
H -2.79006 -2.36091 -3.55156  
H -1.17324 -3.10655 -3.66338  
H -1.36865 -1.48351 -2.93981  
C -3.47901 4.88184 -0.21592  
H -4.23941 5.57908 0.15288  
C 5.01050 0.36114 -1.15776  
H 5.59710 0.12861 -2.05379  
C 3.61208 1.46843 3.65969  
H 4.19826 0.55010 3.83447  
H 2.99670 1.65611 4.55674  
H 4.32568 2.30597 3.56835  
C -3.45720 -0.49375 3.77129  
H -4.50176 -0.14010 3.71749  
H -2.99883 -0.03343 4.66390  
H -3.48397 -1.58597 3.92691  
C 1.90167 2.64073 2.19165  
H 2.56915 3.49567 1.98380  
H 1.30710 2.88657 3.08902  
H 1.20697 2.54964 1.33798  
C -2.59856 -4.56654 -1.79493  
H -2.74298 -5.05688 -0.81712  
H -1.91324 -5.19289 -2.39232  
H -3.57491 -4.56020 -2.31045  
C -2.11510 5.19023 -0.09136  
H -1.80619 6.13322 0.37458  
C 2.99505 -1.16930 -3.07963  
H 2.10530 -0.52892 -2.94573  
H 2.70735 -2.02974 -3.70935  
H 3.74520 -0.57954 -3.63536  
C 1.43904 2.85941 -2.09776  
H 1.86851 3.20952 -1.14416  
H 1.25675 3.74075 -2.73882  
H 2.20996 2.23666 -2.58311  
C -0.76570 1.36651 -3.62179  
H -0.05672 0.67434 -4.10901  
H -0.84411 2.27065 -4.25150  
H -1.75383 0.87648 -3.61185  
C 5.36284 1.46437 -0.37130  
H 6.21683 2.09050 -0.65031

### 2

SCF (BP86) Energy = -3249.06781181  
Enthalpy 0K = -3247.578531  
Enthalpy 298K = -3247.486235  
Free Energy 298K = -3247.706584  
Lowest Frequency = 5.1638 cm<sup>-1</sup>  
Second Frequency = 15.0562 cm<sup>-1</sup>  
SCF (BP86-D3BJ) Energy = -3249.59578829  
SCF (C6H6) Energy = -3249.07473461  
SCF (BS2) Energy = -3648.33763176

Mg 1.45899 -0.61764 0.20315  
O -0.04883 0.24678 1.27322  
N 3.46617 0.16014 0.23606  
N 2.08672 -2.60078 0.72498  
C 5.63863 0.26879 1.47536  
H 5.99304 0.99996 0.73667  
H 6.44589 -0.44721 1.69249  
H 5.42634 0.82330 2.40784  
C 4.36752 -0.45243 1.03660  
C 4.22832 -1.75284 1.58119  
H 5.06808 -2.05797 2.21050  
C 3.25474 -2.76158 1.39325  
C 3.58311 -4.09630 2.05656  
H 2.94459 -4.24787 2.94452

|   |          |          |          |    |          |          |          |
|---|----------|----------|----------|----|----------|----------|----------|
| H | 4.63344  | -4.12526 | 2.38149  | H  | 3.69370  | -0.89788 | 4.44902  |
| H | 3.39398  | -4.94940 | 1.38818  | C  | 2.77992  | 0.72140  | 5.57836  |
| C | 1.32994  | -3.82255 | 0.51541  | H  | 3.55560  | 0.74369  | 6.35083  |
| C | 1.56409  | -4.58444 | -0.67055 | C  | 1.69519  | 1.61398  | 5.63351  |
| C | 0.87963  | -5.80416 | -0.83648 | H  | 1.62484  | 2.34420  | 6.44692  |
| H | 1.06563  | -6.40203 | -1.73477 | C  | 0.70483  | 1.58642  | 4.64327  |
| C | -0.03181 | -6.26783 | 0.11951  | H  | -0.12087 | 2.30296  | 4.68488  |
| H | -0.55450 | -7.21870 | -0.03089 | Mg | -1.45908 | 0.61767  | -0.20301 |
| C | -0.26634 | -5.50603 | 1.26822  | O  | 0.04869  | -0.24677 | -1.27307 |
| H | -0.97850 | -5.86635 | 2.01838  | N  | -3.46625 | -0.16020 | -0.23562 |
| C | 0.41207  | -4.29251 | 1.49973  | N  | -2.08686 | 2.60076  | -0.72506 |
| C | 0.15416  | -3.54713 | 2.80999  | C  | -5.63913 | -0.26872 | -1.47427 |
| H | 0.92321  | -2.76297 | 2.90470  | H  | -5.99277 | -1.00063 | -0.73596 |
| C | 0.27402  | -4.46219 | 4.05074  | H  | -6.44670 | 0.44734  | -1.69006 |
| H | -0.53970 | -5.20756 | 4.08790  | H  | -5.42754 | -0.82228 | -2.40748 |
| H | 0.20659  | -3.85885 | 4.97242  | C  | -4.36779 | 0.45235  | -1.03594 |
| H | 1.22923  | -5.01461 | 4.07226  | C  | -4.22863 | 1.75269  | -1.58075 |
| C | -1.22285 | -2.85124 | 2.79976  | H  | -5.06853 | 2.05776  | -2.20991 |
| H | -1.30941 | -2.14255 | 1.96156  | C  | -3.25496 | 2.76142  | -1.39321 |
| H | -1.37863 | -2.28490 | 3.73357  | C  | -3.58332 | 4.09596  | -2.05690 |
| H | -2.04037 | -3.58479 | 2.69949  | H  | -2.94486 | 4.24718  | -2.94496 |
| C | 2.57037  | -4.13948 | -1.73611 | H  | -4.63367 | 4.12489  | -2.38175 |
| H | 2.70581  | -3.05048 | -1.61923 | H  | -3.39406 | 4.94928  | -1.38883 |
| C | 2.06772  | -4.39295 | -3.17290 | C  | -1.33011 | 3.82262  | -0.51581 |
| H | 2.03388  | -5.46977 | -3.41669 | C  | -1.56446 | 4.58495  | 0.66983  |
| H | 2.74936  | -3.91870 | -3.90010 | C  | -0.88006 | 5.80476  | 0.83542  |
| H | 1.05870  | -3.97631 | -3.32238 | H  | -1.06622 | 6.40295  | 1.73347  |
| C | 3.95297  | -4.80752 | -1.54234 | C  | 0.03150  | 6.26812  | -0.12061 |
| H | 4.41400  | -4.53391 | -0.58028 | H  | 0.55410  | 7.21909  | 0.02951  |
| H | 4.64584  | -4.49769 | -2.34478 | C  | 0.26622  | 5.50590  | -1.26900 |
| H | 3.86557  | -5.90837 | -1.57878 | H  | 0.97846  | 5.86597  | -2.01921 |
| C | 3.90372  | 1.39561  | -0.39141 | C  | -0.41209 | 4.29226  | -1.50014 |
| C | 4.59970  | 1.34242  | -1.64034 | C  | -0.15384 | 3.54641  | -2.81006 |
| C | 4.99077  | 2.55184  | -2.24815 | H  | -0.92234 | 2.76165  | -2.90430 |
| H | 5.52689  | 2.51759  | -3.20249 | C  | -0.27445 | 4.46079  | -4.05124 |
| C | 4.72323  | 3.79175  | -1.65677 | H  | 0.53866  | 5.20680  | -4.08874 |
| H | 5.03464  | 4.71869  | -2.15045 | H  | -0.20656 | 3.85708  | -4.97264 |
| C | 4.07764  | 3.83063  | -0.41761 | H  | -1.23011 | 5.01242  | -4.07302 |
| H | 3.89280  | 4.79587  | 0.06653  | C  | 1.22370  | 2.85156  | -2.79963 |
| C | 3.67833  | 2.65148  | 0.24298  | H  | 1.31094  | 2.14345  | -1.96101 |
| C | 3.08930  | 2.76975  | 1.64771  | H  | 1.37977  | 2.28477  | -3.73312 |
| H | 2.93118  | 1.75054  | 2.03742  | H  | 2.04069  | 3.58577  | -2.69991 |
| C | 4.05987  | 3.49222  | 2.61307  | C  | -2.57091 | 4.14044  | 1.73541  |
| H | 5.06307  | 3.03402  | 2.61194  | H  | -2.70682 | 3.05150  | 1.61854  |
| H | 3.66487  | 3.45263  | 3.64259  | C  | -2.06810 | 4.39372  | 3.17218  |
| H | 4.18159  | 4.55584  | 2.34113  | H  | -2.03356 | 5.47054  | 3.41587  |
| C | 1.72799  | 3.48941  | 1.64056  | H  | -2.75001 | 3.91996  | 3.89944  |
| H | 1.81098  | 4.50899  | 1.22937  | H  | -1.05934 | 3.97645  | 3.32166  |
| H | 1.33317  | 3.56806  | 2.66752  | C  | -3.95322 | 4.80910  | 1.54165  |
| H | 0.98556  | 2.94979  | 1.03206  | H  | -4.41434 | 4.53575  | 0.57956  |
| C | 5.01986  | 0.02513  | -2.30229 | H  | -4.64625 | 4.49953  | 2.34405  |
| H | 4.42012  | -0.78414 | -1.84967 | H  | -3.86534 | 5.90991  | 1.57815  |
| C | 4.77967  | 0.01735  | -3.82851 | C  | -3.90349 | -1.39581 | 0.39180  |
| H | 3.75721  | 0.33893  | -4.08167 | C  | -4.59912 | -1.34291 | 1.64093  |
| H | 4.93677  | -0.99767 | -4.23349 | C  | -4.98986 | -2.55248 | 2.24867  |
| H | 5.48534  | 0.68506  | -4.35356 | H  | -5.52570 | -2.51845 | 3.20318  |
| C | 6.50738  | -0.29979 | -2.01751 | C  | -4.72234 | -3.79226 | 1.65702  |
| H | 7.16184  | 0.50049  | -2.40668 | H  | -5.03351 | -4.71932 | 2.15063  |
| H | 6.79645  | -1.24393 | -2.51234 | C  | -4.07713 | -3.83085 | 0.41765  |
| H | 6.71069  | -0.40814 | -0.94091 | H  | -3.89235 | -4.79599 | -0.06672 |
| C | -0.33821 | 0.60487  | 2.56185  | C  | -3.67815 | -2.65156 | -0.24286 |
| C | -1.61332 | 0.88008  | 2.94126  | C  | -3.08962 | -2.76955 | -1.64782 |
| H | -2.44847 | 0.79743  | 2.24056  | H  | -2.93154 | -1.75026 | -2.03735 |
| H | -1.85959 | 1.13947  | 3.97032  | C  | -4.06062 | -3.49170 | -2.61298 |
| C | 0.76287  | 0.66084  | 3.57240  | H  | -5.06376 | -3.03336 | -2.61139 |
| C | 1.86432  | -0.21799 | 3.52714  | H  | -3.66599 | -3.45194 | -3.64263 |
| H | 1.94378  | -0.96344 | 2.73157  | H  | -4.18237 | -4.55536 | -2.34122 |
| C | 2.85889  | -0.19331 | 4.51816  | C  | -1.72838 | -3.48935 | -1.64132 |

H -1.81131 -4.50899 -1.23027  
H -1.33398 -3.56786 -2.66846  
H -0.98566 -2.94990 -1.03303  
C -5.01939 -0.02580 2.30315  
H -4.42017 0.78369 1.85026  
C -4.77844 -0.01800 3.82925  
H -3.75565 -0.33899 4.08185  
H -4.93591 0.99690 4.23439  
H -5.48344 -0.68616 4.35461  
C -6.50717 0.29856 2.01910  
H -7.16115 -0.50187 2.40876  
H -6.79631 1.24269 2.51390  
H -6.71109 0.40661 0.94258  
C 0.33822 -0.60430 -2.56183  
C 1.61347 -0.87870 -2.94135  
H 2.44858 -0.79576 -2.24064  
H 1.85985 -1.13765 -3.97050  
C -0.76286 -0.66058 -3.57237  
C -1.86476 0.21769 -3.52694  
H -1.94465 0.96293 -2.73122  
C -2.85930 0.19273 -4.51797  
H -3.69445 0.89689 -4.44869  
C -2.77987 -0.72170 -5.57838  
H -3.55553 -0.74421 -6.35086  
C -1.69469 -1.61373 -5.63370  
H -1.62397 -2.34374 -6.44727  
C -0.70435 -1.58589 -4.64345  
H 0.12170 -2.30201 -4.68520

### 3

SCF (BP86) Energy = -2132.24128814  
Enthalpy 0K = -2131.274584  
Enthalpy 298K = -2131.211921  
Free Energy 298K = -2131.375300  
Lowest Frequency = 13.7676 cm<sup>-1</sup>  
Second Frequency = 18.4533 cm<sup>-1</sup>  
SCF (BP86-D3BJ) Energy = -2132.55279427  
SCF (C6H6) Energy = -2132.24780317  
SCF (BS2) Energy = -2617.62170294

Si 0.51148 0.02033 2.83817  
Mg 0.55919 -0.03658 0.17607  
O -1.36360 -0.48546 -0.55419  
N 1.67834 -1.49788 -0.85902  
N 1.15615 1.49674 -1.14955  
C 2.51594 -2.50177 -2.97554  
H 3.32769 -3.01426 -2.43525  
H 2.89405 -2.16775 -3.95317  
H 1.73097 -3.25874 -3.14943  
C 1.96191 -1.33481 -2.16553  
C 1.77554 -0.11985 -2.87901  
H 2.01197 -0.18099 -3.94484  
C 1.49477 1.19482 -2.41631  
C 1.57456 2.29421 -3.46932  
H 0.56076 2.51904 -3.84848  
H 2.19563 1.98907 -4.32503  
H 1.97205 3.23116 -3.05130  
C 1.12304 2.87513 -0.72957  
C 2.31676 3.47809 -0.22681  
C 2.25712 4.80094 0.25247  
H 3.17117 5.27071 0.63269  
C 1.05949 5.52568 0.25656  
H 1.03484 6.55138 0.63976  
C -0.10419 4.92691 -0.23785  
H -1.04217 5.49421 -0.24446  
C -0.09786 3.61068 -0.74074  
C -1.39333 3.02675 -1.30524  
H -1.16802 2.00495 -1.65684

C -1.90723 3.84005 -2.51608  
H -2.20359 4.86085 -2.21578  
H -2.79131 3.35208 -2.96263  
H -1.13705 3.93749 -3.29950  
C -2.49548 2.92431 -0.22805  
H -2.16543 2.33612 0.64400  
H -3.40281 2.45040 -0.64385  
H -2.78714 3.92338 0.14168  
C 3.65981 2.74275 -0.22627  
H 3.45440 1.68295 -0.45774  
C 4.36329 2.79702 1.14693  
H 4.65416 3.82729 1.41858  
H 5.28883 2.19480 1.12416  
H 3.71759 2.40586 1.94893  
C 4.60079 3.29066 -1.32590  
H 4.15667 3.20124 -2.33080  
H 5.55744 2.73878 -1.32879  
H 4.82804 4.35795 -1.15318  
C 2.09214 -2.71200 -0.20192  
C 3.32742 -2.71699 0.51627  
C 3.72325 -3.89746 1.17399  
H 4.67313 -3.91292 1.71828  
C 2.92567 -5.04823 1.15422  
H 3.25187 -5.95540 1.67394  
C 1.70259 -5.02236 0.47739  
H 1.06781 -5.91591 0.47780  
C 1.26317 -3.87077 -0.20528  
C -0.10452 -3.89776 -0.88982  
H -0.21879 -2.94923 -1.44352  
C -0.24258 -5.06032 -1.89900  
H 0.56335 -5.05197 -2.65243  
H -1.20848 -4.99809 -2.43065  
H -0.20917 -6.04106 -1.39273  
C -1.23632 -3.96653 0.16115  
H -1.15967 -4.88949 0.76252  
H -2.22786 -3.96341 -0.32504  
H -1.19330 -3.11010 0.85367  
C 4.22524 -1.47818 0.56768  
H 3.57479 -0.60195 0.38797  
C 4.90669 -1.28329 1.93824  
H 4.17858 -1.32733 2.76483  
H 5.40732 -0.30051 1.97432  
H 5.68218 -2.04681 2.12781  
C 5.29010 -1.49757 -0.55479  
H 5.93844 -2.38735 -0.46174  
H 5.93371 -0.60194 -0.49499  
H 4.83085 -1.51396 -1.55611  
C -2.53017 -0.63789 -0.99558  
C -2.82201 -0.33317 -2.42600  
C -1.76677 -0.40801 -3.36616  
H -0.76454 -0.69449 -3.02963  
C -2.00208 -0.10867 -4.71272  
H -1.18276 -0.18424 -5.43467  
C -3.28160 0.29428 -5.13535  
H -3.46071 0.53363 -6.18884  
C -4.32845 0.40095 -4.20423  
H -5.31926 0.73653 -4.52654  
C -4.10521 0.08323 -2.85745  
H -4.91552 0.18776 -2.13046  
C -3.60635 -1.11916 -0.08832  
C -4.68101 -1.91424 -0.55822  
H -4.73323 -2.18953 -1.61569  
C -5.64933 -2.38837 0.33648  
H -6.46535 -3.01950 -0.02987  
C -5.56949 -2.05671 1.69990  
H -6.33512 -2.41768 2.39479  
C -4.50513 -1.26937 2.17408  
H -4.43241 -1.00184 3.23253

C -3.51852 -0.81724 1.29124  
H -2.68539 -0.21262 1.66317  
C 1.93520 1.00076 3.71235  
H 2.92710 0.64576 3.38300  
H 1.87923 0.88615 4.80979  
H 1.87044 2.07831 3.48268  
C 0.61714 -1.76035 3.58752  
H -0.23446 -2.39078 3.27592  
H 0.64326 -1.74503 4.69292  
H 1.53284 -2.26635 3.23549  
C -1.06852 0.80299 3.64896  
C -1.39941 2.16078 3.40965  
H -0.76987 2.75623 2.73480  
C -2.50479 2.77571 4.01996  
H -2.72478 3.83027 3.81681  
C -3.32657 2.04184 4.89243  
H -4.18911 2.51762 5.37219  
C -3.02558 0.69412 5.14821  
H -3.64905 0.11563 5.84123  
C -1.91377 0.08848 4.53334  
H -1.69068 -0.96041 4.76221

#### 4

SCF (BP86) Energy = -2907.36423649  
Enthalpy 0K = -2906.226906  
Enthalpy 298K = -2906.150140  
Free Energy 298K = -2906.346087  
Lowest Frequency = 10.3157 cm<sup>-1</sup>  
Second Frequency = 10.7485 cm<sup>-1</sup>  
SCF (BP86-D3BJ) Energy = -2907.76267774  
SCF (C6H6) Energy = -2907.37064858  
SCF (BS2) Energy = -3392.96433290

Mg 1.22362 -0.53203 -0.01899  
O -0.46178 -1.07925 -0.78138  
N 2.00627 -1.93777 1.34069  
N 3.04236 -0.21275 -0.98445  
C 3.64957 -3.74455 1.87065  
H 4.39597 -3.33666 2.57552  
H 4.16150 -4.50596 1.26131  
H 2.86432 -4.22695 2.46976  
C 3.10867 -2.62827 0.98366  
C 3.88721 -2.36323 -0.17649  
H 4.68221 -3.09168 -0.35611  
C 3.93576 -1.22635 -1.02013  
C 5.08335 -1.18962 -2.02095  
H 4.69599 -1.36400 -3.04052  
H 5.83349 -1.96354 -1.80165  
H 5.57917 -0.20635 -2.03678  
C 3.37362 1.01176 -1.67106  
C 4.08013 2.03064 -0.95760  
C 4.39959 3.23008 -1.62452  
H 4.95578 4.00684 -1.08885  
C 4.02076 3.45052 -2.95495  
H 4.28486 4.38747 -3.45752  
C 3.30661 2.45864 -3.63533  
H 3.00379 2.62888 -4.67471  
C 2.97690 1.23297 -3.02180  
C 2.19944 0.19420 -3.82872  
H 2.10176 -0.71463 -3.21009  
C 2.92514 -0.20009 -5.13555  
H 2.97431 0.64661 -5.84338  
H 2.38497 -1.02332 -5.63289  
H 3.96002 -0.53394 -4.94879  
C 0.77487 0.70175 -4.14269  
H 0.22452 0.93968 -3.21834  
H 0.20566 -0.06799 -4.69075  
H 0.80379 1.61517 -4.76362

C 4.51552 1.84387 0.49854  
H 3.91513 1.01438 0.91285  
C 4.25289 3.09697 1.36144  
H 4.89302 3.94599 1.06330  
H 4.47536 2.88274 2.42060  
H 3.20310 3.42690 1.29241  
C 6.00458 1.43537 0.59794  
H 6.20434 0.48618 0.07538  
H 6.30317 1.30816 1.65363  
H 6.65437 2.21060 0.15373  
C 1.42899 -2.20884 2.63751  
C 1.99688 -1.61858 3.80528  
C 1.40905 -1.88643 5.05723  
H 1.84181 -1.43316 5.95631  
C 0.29163 -2.71806 5.17506  
H -0.14393 -2.92491 6.15867  
C -0.26762 -3.28294 4.02210  
H -1.14399 -3.93201 4.11421  
C 0.27242 -3.04166 2.74293  
C -0.36345 -3.69866 1.51481  
H -0.18791 -3.02328 0.65966  
C 0.29478 -5.05926 1.18236  
H 1.36719 -4.95779 0.95339  
H -0.19383 -5.51443 0.30343  
H 0.19203 -5.76043 2.03015  
C -1.88894 -3.88359 1.64311  
H -2.15249 -4.66513 2.37863  
H -2.31247 -4.19120 0.67350  
H -2.39376 -2.95022 1.94216  
C 3.20648 -0.68240 3.75092  
H 3.58698 -0.67919 2.71490  
C 2.79201 0.76437 4.10282  
H 2.02977 1.14475 3.40381  
H 3.66419 1.44061 4.06642  
H 2.36716 0.81827 5.12055  
C 4.35508 -1.14766 4.67504  
H 4.06675 -1.09290 5.73962  
H 5.24171 -0.50365 4.54110  
H 4.65477 -2.18870 4.46806  
C -1.11132 -1.88197 -1.60818  
C -0.29853 -2.61361 -2.63109  
C 0.94629 -3.18471 -2.27427  
H 1.29124 -3.12989 -1.23596  
C 1.73362 -3.85640 -3.22027  
H 2.68515 -4.30000 -2.90849  
C 1.30500 -3.96237 -4.55445  
H 1.91995 -4.48628 -5.29367  
C 0.08101 -3.38340 -4.93154  
H -0.25753 -3.44348 -5.97179  
C -0.70759 -2.71451 -3.98358  
H -1.64789 -2.24490 -4.29014  
C -2.50435 -2.07074 -1.48951  
C -3.18699 -3.18170 -2.10324  
H -2.65663 -3.78515 -2.84546  
C -4.43784 -3.59501 -1.69468  
H -4.92255 -4.47294 -2.12972  
C -5.06177 -2.94114 -0.56939  
C -4.52745 -1.85012 0.03848  
H -5.00979 -1.41306 0.91671  
C -3.32797 -1.17598 -0.57181  
H -2.67606 -0.73248 0.20157  
C -2.57526 1.38655 -2.28359  
H -1.88916 1.73348 -1.49457  
H -2.94046 2.26376 -2.84435  
H -1.99321 0.75573 -2.97424  
C -5.06479 1.46018 -0.41152  
C -6.36261 1.06400 -0.00344  
H -6.77899 0.11696 -0.36570

|    |          |          |          |
|----|----------|----------|----------|
| C  | -7.13494 | 1.85880  | 0.85859  |
| H  | -8.13551 | 1.52683  | 1.15742  |
| C  | -6.62839 | 3.08029  | 1.33193  |
| H  | -7.23051 | 3.70463  | 2.00114  |
| C  | -5.34802 | 3.49853  | 0.93608  |
| H  | -4.95045 | 4.45554  | 1.29346  |
| C  | -4.57888 | 2.69589  | 0.07710  |
| H  | -3.58438 | 3.04554  | -0.22435 |
| Si | -4.01941 | 0.37130  | -1.58350 |
| C  | -5.12559 | -0.22672 | -3.01112 |
| H  | -5.55923 | 0.63888  | -3.54026 |
| H  | -4.54386 | -0.82017 | -3.73492 |
| H  | -5.95278 | -0.85779 | -2.64913 |
| C  | 0.00021  | 2.21115  | 1.12961  |
| O  | 0.65517  | 1.29358  | 0.54454  |
| C  | -0.09646 | 3.53624  | 0.48449  |
| C  | -1.11090 | 4.47431  | 0.81487  |
| C  | 0.81561  | 3.85611  | -0.55666 |
| C  | -1.19629 | 5.70050  | 0.14856  |
| H  | -1.85689 | 4.22429  | 1.57382  |
| C  | 0.74566  | 5.08207  | -1.21946 |
| H  | 1.58912  | 3.13230  | -0.82754 |
| C  | -0.25958 | 5.98972  | -0.85432 |
| H  | -1.97918 | 6.42678  | 0.38180  |
| H  | 1.45499  | 5.33813  | -2.01041 |
| C  | -0.64318 | 1.92763  | 2.43632  |
| C  | -0.69754 | 2.89602  | 3.46996  |
| C  | -1.14135 | 0.62572  | 2.68891  |
| C  | -1.24931 | 2.56984  | 4.71569  |
| H  | -0.26695 | 3.88847  | 3.30692  |
| C  | -1.70284 | 0.31045  | 3.93018  |
| H  | -1.11022 | -0.12247 | 1.89003  |
| C  | -1.75965 | 1.28132  | 4.94611  |
| H  | -1.27146 | 3.32076  | 5.51212  |
| H  | -2.08405 | -0.69884 | 4.10890  |
| F  | -6.20365 | -3.51676 | -0.08998 |
| F  | -0.33529 | 7.17801  | -1.49458 |
| H  | -2.19557 | 1.03084  | 5.91866  |

## 5

SCF (BP86) Energy = -2706.58661577  
 Enthalpy 0K = -2705.473492  
 Enthalpy 298K = -2705.401306  
 Free Energy 298K = -2705.585028  
 Lowest Frequency = 7.5912 cm<sup>-1</sup>  
 Second Frequency = 10.1410 cm<sup>-1</sup>  
 SCF (BP86-D3BJ) Energy = -2706.97613274  
 SCF (C6H6) Energy = -2706.59383262  
 SCF (BS2) Energy = -3192.10971605

|    |          |          |          |
|----|----------|----------|----------|
| Si | 2.62840  | -2.79962 | 0.87909  |
| Mg | 1.09463  | 0.16225  | 0.04949  |
| O  | -1.03144 | 0.19825  | -0.04955 |
| O  | 1.56520  | -1.62278 | 0.39881  |
| N  | 1.51993  | 1.79764  | 1.27830  |
| N  | 1.68315  | 1.12654  | -1.69773 |
| C  | 1.25403  | 4.24259  | 1.64074  |
| H  | 0.66707  | 4.04939  | 2.55400  |
| H  | 0.82880  | 5.10799  | 1.11087  |
| H  | 2.26892  | 4.51707  | 1.97628  |
| C  | 1.29328  | 3.01595  | 0.73860  |
| C  | 1.10801  | 3.25849  | -0.64701 |
| H  | 0.81635  | 4.28219  | -0.89313 |
| C  | 1.36936  | 2.43555  | -1.77532 |
| C  | 1.24952  | 3.10857  | -3.13722 |
| H  | 2.04233  | 2.77915  | -3.82598 |
| H  | 1.27907  | 4.20506  | -3.05081 |
| H  | 0.28639  | 2.82799  | -3.60137 |

|   |          |          |          |
|---|----------|----------|----------|
| C | 2.19939  | 0.45068  | -2.86142 |
| C | 1.33020  | -0.25362 | -3.74109 |
| C | 1.88117  | -0.94192 | -4.84035 |
| H | 1.21248  | -1.48691 | -5.51636 |
| C | 3.25654  | -0.93815 | -5.08745 |
| H | 3.66679  | -1.47211 | -5.95135 |
| C | 4.10737  | -0.25385 | -4.21101 |
| H | 5.18583  | -0.26522 | -4.39713 |
| C | 3.61115  | 0.43492  | -3.08748 |
| C | 4.58386  | 1.14422  | -2.14060 |
| H | 4.10228  | 1.16047  | -1.14495 |
| C | 4.83535  | 2.61365  | -2.55715 |
| H | 5.24511  | 2.66318  | -3.58207 |
| H | 5.56657  | 3.08763  | -1.87808 |
| H | 3.91400  | 3.21544  | -2.52719 |
| C | 5.93419  | 0.40917  | -2.00645 |
| H | 5.79806  | -0.65548 | -1.75591 |
| H | 6.54037  | 0.87492  | -1.21080 |
| H | 6.53009  | 0.46915  | -2.93462 |
| C | -0.18135 | -0.30248 | -3.52574 |
| H | -0.42742 | 0.38398  | -2.69598 |
| C | -0.95826 | 0.17007  | -4.77445 |
| H | -0.64163 | 1.17914  | -5.09000 |
| H | -2.04128 | 0.19591  | -4.56862 |
| H | -0.79827 | -0.50872 | -5.63092 |
| C | -0.63065 | -1.72172 | -3.10842 |
| H | -0.41902 | -2.45282 | -3.90926 |
| H | -1.71622 | -1.74560 | -2.90863 |
| H | -0.10049 | -2.05929 | -2.20171 |
| C | 1.97260  | 1.72560  | 2.64490  |
| C | 3.34971  | 1.95279  | 2.95049  |
| C | 3.78001  | 1.84451  | 4.28705  |
| H | 4.83706  | 2.01763  | 4.51978  |
| C | 2.89452  | 1.51682  | 5.31938  |
| H | 3.24997  | 1.43946  | 6.35236  |
| C | 1.55108  | 1.28173  | 5.01194  |
| H | 0.85260  | 1.01864  | 5.81471  |
| C | 1.06928  | 1.37825  | 3.69180  |
| C | -0.41269 | 1.10836  | 3.43544  |
| H | -0.58662 | 1.24111  | 2.35294  |
| C | -1.31959 | 2.11196  | 4.18466  |
| H | -1.20031 | 2.02159  | 5.27872  |
| H | -2.38399 | 1.92599  | 3.95378  |
| H | -1.08544 | 3.15627  | 3.91412  |
| C | -0.78790 | -0.34318 | 3.80950  |
| H | -0.18865 | -1.07125 | 3.23836  |
| H | -1.85483 | -0.53873 | 3.60521  |
| H | -0.61459 | -0.53361 | 4.88335  |
| C | 4.39125  | 2.26783  | 1.87468  |
| H | 3.86545  | 2.35676  | 0.90873  |
| C | 5.40816  | 1.11010  | 1.75356  |
| H | 5.95619  | 0.95986  | 2.70048  |
| H | 6.15227  | 1.32267  | 0.96658  |
| H | 4.90592  | 0.16071  | 1.50431  |
| C | 5.13052  | 3.59994  | 2.13678  |
| H | 4.43282  | 4.44984  | 2.22606  |
| H | 5.82851  | 3.82164  | 1.31061  |
| H | 5.72257  | 3.55842  | 3.06815  |
| C | -2.17725 | -0.21194 | 0.24661  |
| C | -2.43067 | -1.54220 | 0.82275  |
| C | -1.42597 | -2.53653 | 0.74310  |
| H | -0.43571 | -2.28406 | 0.33677  |
| C | -1.67903 | -3.83166 | 1.20581  |
| H | -0.90173 | -4.59695 | 1.12447  |
| C | -2.93378 | -4.13491 | 1.76309  |
| H | -3.14691 | -5.15169 | 2.11030  |
| C | -3.91804 | -3.14570 | 1.89046  |
| H | -4.88190 | -3.40937 | 2.33461  |

|   |          |          |          |   |          |          |          |
|---|----------|----------|----------|---|----------|----------|----------|
| C | -3.68913 | -1.82706 | 1.44326  | H | -5.00612 | 0.59468  | -3.28299 |
| C | -4.67880 | -0.74665 | 1.64945  | H | -4.70328 | -1.08096 | -3.78200 |
| C | -5.75149 | -0.89044 | 2.56136  | H | -3.56619 | 0.22495  | -4.25343 |
| H | -5.83949 | -1.80670 | 3.15212  | C | -3.43912 | -0.40335 | -2.15629 |
| C | -6.68804 | 0.13068  | 2.74938  | C | -4.01390 | -1.37437 | -1.29445 |
| H | -7.50593 | -0.00477 | 3.46415  | H | -4.86519 | -1.90845 | -1.72464 |
| C | -6.56407 | 1.32823  | 2.02778  | C | -3.79441 | -1.63424 | 0.08170  |
| H | -7.28845 | 2.13717  | 2.16646  | C | -4.79608 | -2.57274 | 0.74270  |
| C | -5.49550 | 1.49634  | 1.13648  | H | -4.32346 | -3.54871 | 0.95057  |
| H | -5.39091 | 2.43426  | 0.58442  | H | -5.66837 | -2.74554 | 0.09545  |
| C | -4.54286 | 0.47858  | 0.94720  | H | -5.14343 | -2.17868 | 1.71094  |
| C | -3.41485 | 0.65650  | -0.08385 | C | -2.81508 | -1.28654 | 2.23939  |
| C | -3.95230 | 0.21170  | -1.47908 | C | -3.38026 | -0.24853 | 3.04477  |
| C | -4.45365 | -1.03035 | -1.87935 | C | -3.39982 | -0.40972 | 4.44428  |
| H | -4.46132 | -1.88374 | -1.19483 | H | -3.84218 | 0.37545  | 5.06628  |
| C | -4.96674 | -1.16418 | -3.18420 | C | -2.86421 | -1.55019 | 5.05581  |
| H | -5.36285 | -2.13101 | -3.51044 | H | -2.89402 | -1.65851 | 6.14553  |
| C | -4.98073 | -0.06847 | -4.06591 | C | -2.29315 | -2.54954 | 4.26036  |
| H | -5.38919 | -0.18843 | -5.07454 | H | -1.86801 | -3.44055 | 4.73606  |
| C | -4.47562 | 1.17912  | -3.66349 | C | -2.25976 | -2.44672 | 2.85479  |
| H | -4.49255 | 2.03163  | -4.35069 | C | -1.61119 | -3.57267 | 2.04994  |
| C | -3.95346 | 1.31771  | -2.36631 | H | -1.79104 | -3.37569 | 0.97934  |
| C | -3.40167 | 2.49028  | -1.67461 | C | -2.20493 | -4.96052 | 2.38262  |
| C | -3.06826 | 2.12325  | -0.34771 | H | -1.96006 | -5.27331 | 3.41340  |
| C | -2.55755 | 3.06947  | 0.54474  | H | -1.79084 | -5.71933 | 1.69729  |
| H | -2.31281 | 2.79540  | 1.57529  | H | -3.30418 | -4.97585 | 2.28618  |
| C | -2.37823 | 4.39299  | 0.10124  | C | -0.08160 | -3.57925 | 2.26503  |
| H | -1.98507 | 5.14493  | 0.79261  | H | 0.36447  | -2.62706 | 1.93678  |
| C | -2.70371 | 4.75930  | -1.21790 | H | 0.38375  | -4.39011 | 1.67926  |
| H | -2.56007 | 5.79449  | -1.54469 | H | 0.17053  | -3.73260 | 3.32978  |
| C | -3.21721 | 3.81116  | -2.11693 | C | -3.97943 | 1.01561  | 2.42223  |
| H | -3.47670 | 4.10075  | -3.14074 | H | -3.54665 | 1.11581  | 1.41066  |
| C | 4.26644  | -2.72301 | -0.09333 | C | -3.63334 | 2.29410  | 3.21535  |
| H | 4.07617  | -2.77484 | -1.17881 | H | -4.14027 | 2.32238  | 4.19615  |
| H | 4.93334  | -3.55988 | 0.17837  | H | -3.96067 | 3.18728  | 2.65701  |
| H | 4.80239  | -1.78006 | 0.11161  | H | -2.54885 | 2.38214  | 3.39521  |
| C | 3.01653  | -2.69459 | 2.74224  | C | -5.51273 | 0.89188  | 2.25646  |
| H | 3.41817  | -1.69625 | 2.98662  | H | -5.78571 | 0.04802  | 1.60264  |
| H | 3.76671  | -3.44340 | 3.05233  | H | -5.93094 | 1.81219  | 1.81132  |
| H | 2.11000  | -2.84250 | 3.35388  | H | -6.00146 | 0.73668  | 3.23504  |
| C | 1.86125  | -4.52500 | 0.52292  | C | -2.01536 | 1.43917  | -2.70115 |
| C | 1.73954  | -5.52761 | 1.51357  | C | -2.76847 | 2.64475  | -2.56160 |
| H | 2.08882  | -5.32476 | 2.53299  | C | -2.42708 | 3.75450  | -3.35904 |
| C | 1.17470  | -6.78370 | 1.22754  | H | -3.00076 | 4.68211  | -3.25318 |
| H | 1.09416  | -7.54089 | 2.01624  | C | -1.37290 | 3.69800  | -4.27664 |
| C | 0.71536  | -7.06770 | -0.06896 | H | -1.13089 | 4.56799  | -4.89708 |
| H | 0.27555  | -8.04519 | -0.29679 | C | -0.63082 | 2.51643  | -4.39728 |
| C | 0.82782  | -6.09086 | -1.07339 | H | 0.19537  | 2.47332  | -5.11313 |
| H | 0.47431  | -6.30554 | -2.08848 | C | -0.92696 | 1.37546  | -3.62443 |
| C | 1.39376  | -4.84025 | -0.77641 | C | -0.11788 | 0.09142  | -3.82229 |
| H | 1.47077  | -4.08935 | -1.57231 | H | -0.07155 | -0.42663 | -2.84708 |
|   |          |          |          | C | -0.81067 | -0.86904 | -4.81870 |
|   |          |          |          | H | -1.81228 | -1.17099 | -4.47452 |
|   |          |          |          | H | -0.20891 | -1.78537 | -4.94528 |
|   |          |          |          | H | -0.91868 | -0.39041 | -5.80873 |
|   |          |          |          | C | 1.33332  | 0.34432  | -4.27352 |
|   |          |          |          | H | 1.38321  | 0.71305  | -5.31433 |
|   |          |          |          | H | 1.90828  | -0.59410 | -4.23036 |
|   |          |          |          | H | 1.84292  | 1.07816  | -3.62739 |
|   |          |          |          | C | -3.90340 | 2.79771  | -1.54503 |
|   |          |          |          | H | -4.12483 | 1.80216  | -1.12436 |
|   |          |          |          | C | -3.46023 | 3.70520  | -0.37493 |
|   |          |          |          | H | -2.57451 | 3.29119  | 0.13317  |
|   |          |          |          | H | -4.27293 | 3.80935  | 0.36594  |
|   |          |          |          | H | -3.19973 | 4.71638  | -0.73421 |
|   |          |          |          | C | -5.20363 | 3.34115  | -2.17997 |
|   |          |          |          | H | -5.08230 | 4.38114  | -2.53093 |
|   |          |          |          | H | -6.02147 | 3.33982  | -1.43849 |

**4''**

SCF (BP86) Energy = -2708.89455339  
 Enthalpy 0K = -2707.740848  
 Enthalpy 298K = -2707.666177  
 Free Energy 298K = -2707.855386  
 Lowest Frequency = 10.8161 cm<sup>-1</sup>  
 Second Frequency = 12.7374 cm<sup>-1</sup>  
 SCF (BP86-D3BJ) Energy = -2709.2920684  
 SCF (C6H6) Energy = -2708.90055344  
 SCF (BS2) Energy = -3194.41761491

|    |          |          |          |
|----|----------|----------|----------|
| Mg | -1.16222 | -0.24571 | -0.20176 |
| O  | 0.48796  | -1.21962 | -0.46587 |
| N  | -2.32351 | 0.30027  | -1.87369 |
| N  | -2.78072 | -1.11313 | 0.80755  |
| C  | -4.21119 | -0.15392 | -3.44742 |



H -5.52588 2.73709 -3.04494  
C 1.09257 -2.17707 -1.15412  
C 0.31378 -3.43322 -1.40435  
C -1.03695 -3.37090 -1.81844  
H -1.50077 -2.39920 -2.01804  
C -1.79127 -4.53675 -2.01306  
H -2.83141 -4.45242 -2.34559  
C -1.21931 -5.79967 -1.78382  
H -1.80901 -6.71036 -1.93263  
C 0.11689 -5.88069 -1.35579  
H 0.57193 -6.85752 -1.15762  
C 0.87146 -4.71343 -1.16580  
H 1.90415 -4.78368 -0.80875  
C 2.40683 -2.01530 -1.63905  
C 2.97450 -2.88423 -2.64088  
H 2.45026 -3.81114 -2.89183  
C 4.07971 -2.52478 -3.38566  
H 4.44811 -3.19538 -4.16890  
C 4.66644 -1.20727 -3.24105  
C 4.22518 -0.36143 -2.26491  
H 4.62966 0.65282 -2.17937  
C 3.25051 -0.81967 -1.21935  
H 2.60412 0.00179 -0.86085  
C 3.24784 -1.63579 1.85229  
H 2.61730 -0.76928 2.10877  
H 3.85290 -1.90228 2.73586  
H 2.57704 -2.48039 1.62858  
C 5.55419 0.13961 0.74222  
C 6.69720 0.38308 -0.05923  
H 6.89674 -0.25944 -0.92450  
C 7.58393 1.43332 0.22646  
H 8.46026 1.59711 -0.41083  
C 7.35185 2.26939 1.33113  
H 8.04426 3.08731 1.55890  
C 6.22984 2.04502 2.14436  
H 6.04681 2.68856 3.01282  
C 5.34489 0.99358 1.85084  
H 4.47880 0.83302 2.50256  
Si 4.35774 -1.30007 0.34945  
C 5.39352 -2.84910 -0.03338  
H 6.08650 -3.05222 0.80096  
H 4.74510 -3.72965 -0.16925  
H 5.98553 -2.72486 -0.95391  
C 0.21259 2.24817 1.31224  
O -0.51450 1.44000 0.65181  
C 0.77954 1.83938 2.61989  
C 1.99659 2.37508 3.11574  
C 0.10731 0.85438 3.38624  
C 2.50567 1.95121 4.35059  
H 2.56100 3.09130 2.51258  
C 0.61414 0.44533 4.62393  
H -0.83071 0.43169 3.01594  
C 1.81425 0.99293 5.11194  
H 3.45104 2.36464 4.71671  
H 0.06522 -0.30225 5.20428  
H 2.21328 0.66931 6.07885  
C 0.46406 3.59567 0.75097  
C 0.72937 4.72310 1.57117  
C 0.37731 3.77695 -0.65304  
C 0.92646 5.98523 0.99864  
H 0.74226 4.61194 2.65902  
C 0.59357 5.03719 -1.21905  
H 0.14369 2.91897 -1.28948  
C 0.87132 6.14435 -0.39723  
H 1.11512 6.84970 1.64345  
H 0.53214 5.15272 -2.30522  
H 1.03380 7.13151 -0.84252  
H 5.42336 -0.87647 -3.96153

**A**  
SCF (BP86) Energy = -2231.47277261  
Enthalpy 0K = -2230.514572  
Enthalpy 298K = -2230.450759  
Free Energy 298K = -2230.618446  
Lowest Frequency = 9.3407 cm<sup>-1</sup>  
Second Frequency = 14.9938 cm<sup>-1</sup>  
SCF (BP86-D3BJ) Energy = -2231.78607905  
SCF (C6H6) Energy = -2231.48018791  
SCF (BS2) Energy = -2716.89123071

Mg 0.25634 0.08821 0.20375  
O -1.69179 -0.75917 0.27080  
N 0.82642 -0.69568 -1.67495  
N -0.18878 1.98730 -0.59633  
C 0.40255 -0.90809 -4.11624  
H 1.39561 -0.71064 -4.55512  
H -0.35605 -0.56696 -4.83708  
H 0.32445 -2.00026 -3.99584  
C 0.24854 -0.18828 -2.78172  
C -0.49129 1.02596 -2.82427  
H -0.91426 1.25934 -3.80529  
C -0.59211 2.08166 -1.87539  
C -1.18343 3.38844 -2.38723  
H -2.00006 3.73738 -1.73334  
H -1.56472 3.28292 -3.41372  
H -0.42256 4.18735 -2.38273  
C -0.18467 3.17187 0.22532  
C 0.96352 4.01849 0.24418  
C 0.96569 5.13942 1.09759  
H 1.84506 5.79355 1.11231  
C -0.12252 5.43307 1.92653  
H -0.09811 6.30906 2.58337  
C -1.23957 4.59117 1.91001  
H -2.09281 4.81402 2.56114  
C -1.29541 3.46099 1.07177  
C -2.54317 2.57792 1.10278  
H -2.41588 1.79937 0.33130  
C -3.82938 3.36577 0.76659  
H -4.04386 4.13668 1.52766  
H -4.69871 2.68609 0.72659  
H -3.75258 3.87616 -0.20854  
C -2.68804 1.86630 2.46713  
H -1.79307 1.26502 2.70166  
H -3.56748 1.19712 2.46986  
H -2.82195 2.59561 3.28554  
C 2.19907 3.74838 -0.61784  
H 2.00932 2.82766 -1.19634  
C 3.44950 3.50480 0.25697  
H 3.67444 4.38270 0.88823  
H 4.33399 3.31334 -0.37453  
H 3.31650 2.63537 0.92146  
C 2.46472 4.89425 -1.62190  
H 1.59696 5.07911 -2.27782  
H 3.32892 4.65179 -2.26489  
H 2.69313 5.84056 -1.10018  
C 1.77341 -1.77324 -1.83446  
C 3.11866 -1.48200 -2.21613  
C 4.03784 -2.54302 -2.32469  
H 5.07136 -2.32076 -2.61330  
C 3.66609 -3.86702 -2.06757  
H 4.39746 -4.67686 -2.16180  
C 2.34878 -4.14301 -1.68735  
H 2.05078 -5.17871 -1.48711  
C 1.38845 -3.11934 -1.56384  
C -0.03783 -3.49795 -1.16328  
H -0.62182 -2.56435 -1.09688  
C -0.71336 -4.39848 -2.22361

H -0.73652 -3.91539 -3.21523  
H -1.75394 -4.62814 -1.93266  
H -0.17874 -5.35842 -2.33441  
C -0.07148 -4.17943 0.22274  
H 0.50610 -5.12069 0.22132  
H -1.10713 -4.42296 0.51577  
H 0.35850 -3.52547 1.00023  
C 3.61402 -0.05884 -2.48685  
H 2.75305 0.62416 -2.38576  
C 4.67727 0.36427 -1.44795  
H 4.28909 0.30933 -0.41859  
H 5.01266 1.39853 -1.64112  
H 5.56569 -0.28898 -1.49945  
C 4.18076 0.10078 -3.91709  
H 5.08407 -0.51766 -4.06286  
H 4.46629 1.15116 -4.10206  
H 3.45191 -0.19282 -4.69173  
C -2.86131 -1.19395 0.43052  
C -3.97847 -0.61532 -0.36130  
C -3.68585 -0.01253 -1.61004  
H -2.65013 0.00644 -1.96985  
C -4.70215 0.55737 -2.38004  
H -4.49645 1.01188 -3.35269  
C -6.01347 0.54680 -1.88216  
C -6.33529 -0.01350 -0.63818  
H -7.36675 0.02324 -0.27845  
C -5.31317 -0.59997 0.11603  
H -5.54580 -1.02002 1.09840  
C -3.11401 -2.28770 1.40938  
C -4.14125 -3.24564 1.22911  
H -4.78276 -3.19814 0.34429  
C -4.30553 -4.28369 2.15667  
H -5.08887 -5.03229 2.00105  
C -3.46294 -4.36695 3.27841  
C -2.43634 -3.42274 3.46051  
H -1.76962 -3.48848 4.32590  
C -2.25194 -2.40063 2.52414  
H -1.44101 -1.67666 2.64091  
C 3.40017 -0.51175 2.30834  
C 3.77962 -1.74319 1.71869  
H 3.00493 -2.43369 1.35993  
C 5.12637 -2.11039 1.57259  
H 5.38154 -3.07232 1.11393  
C 6.14340 -1.23974 2.00044  
H 7.19643 -1.51937 1.88327  
C 5.79772 -0.00651 2.57506  
H 6.58270 0.68133 2.91112  
C 4.44507 0.34665 2.72811  
H 4.20036 1.30828 3.19458  
Si 1.52999 -0.07797 2.54864  
C 0.95850 -1.39928 3.85677  
H -0.04047 -1.15321 4.26145  
H 0.91736 -2.41966 3.43755  
H 1.66329 -1.41516 4.70713  
C 1.50427 1.56776 3.56185  
H 1.86141 2.42959 2.97335  
H 0.47150 1.80382 3.87304  
H 2.11914 1.49353 4.47775  
F -6.99859 1.10071 -2.62157  
H -3.59971 -5.17431 4.00534

**B**  
SCF (BP86) Energy = -2231.46682885  
Enthalpy 0K = -2230.508051  
Enthalpy 298K = -2230.444750  
Free Energy 298K = -2230.609063  
Lowest Frequency = 6.7246 cm<sup>-1</sup>  
Second Frequency = 12.4861 cm<sup>-1</sup>

SCF (BP86-D3BJ) Energy = -2231.78551872  
SCF (C6H6) Energy = -2231.47240465  
SCF (BS2) Energy = -2716.88577102

Mg 0.77724 -0.38425 0.01657  
O -0.81354 0.56345 -0.87628  
N 0.58020 -2.31601 -0.90016  
N 2.69737 -0.07235 -0.80115  
C 1.33449 -4.13024 -2.46128  
H 2.29582 -4.66257 -2.36724  
H 1.11898 -4.04942 -3.54029  
H 0.54872 -4.73941 -1.99445  
C 1.45365 -2.74207 -1.83315  
C 2.57029 -2.00249 -2.30052  
H 3.11942 -2.49396 -3.10927  
C 3.18239 -0.82598 -1.81136  
C 4.51413 -0.46394 -2.45955  
H 4.62139 0.62542 -2.57938  
H 4.61315 -0.94775 -3.44320  
H 5.36098 -0.79647 -1.83397  
C 3.59333 0.89041 -0.21062  
C 4.59735 0.44282 0.70311  
C 5.43409 1.39777 1.31077  
H 6.19917 1.06276 2.02013  
C 5.31239 2.76349 1.02711  
H 5.97785 3.48926 1.50652  
C 4.33288 3.19072 0.12507  
H 4.24219 4.25842 -0.10488  
C 3.45960 2.27819 -0.50072  
C 2.42339 2.80522 -1.49515  
H 1.76753 1.95995 1.77097  
C 3.09147 3.32129 -2.79120  
H 3.77084 4.16579 -2.57821  
H 2.32725 3.67580 -3.50547  
H 3.68291 2.53469 -3.28938  
C 1.53824 3.90731 -0.87567  
H 1.01967 3.53960 0.02480  
H 0.77334 4.24124 -1.59660  
H 2.13260 4.79145 -0.58490  
C 4.77300 -1.03710 1.06203  
H 4.19181 -1.63364 0.33892  
C 4.20188 -1.33957 2.46632  
H 4.72900 -0.75745 3.24311  
H 4.31344 -2.41093 2.71190  
H 3.13074 -1.08254 2.52494  
C 6.24374 -1.50273 0.97123  
H 6.68771 -1.27522 -0.01311  
H 6.30965 -2.59313 1.13088  
H 6.87559 -1.02168 1.73848  
C -0.56298 -3.12511 -0.57188  
C -0.62285 -3.74257 0.71886  
C -1.79245 -4.43538 1.08643  
H -1.84689 -4.90996 2.07039  
C -2.88342 -4.54554 0.21417  
H -3.78206 -5.09214 0.51978  
C -2.80372 -3.96986 -1.05676  
H -3.64876 -4.07205 -1.74715  
C -1.66118 -3.26089 -1.47981  
C -1.65326 -2.70190 -2.90856  
H -0.68334 -2.20389 -3.07670  
C -1.80926 -3.82899 -3.95957  
H -1.06583 -4.63079 -3.82895  
H -1.69981 -3.42099 -4.97997  
H -2.80982 -4.29212 -3.89632  
C -2.76020 -1.64887 -3.13493  
H -3.76450 -2.08787 -3.00032  
H -2.70736 -1.25117 -4.16404  
H -2.66849 -0.80822 -2.43346

|                                               |          |          |          |   |          |          |          |
|-----------------------------------------------|----------|----------|----------|---|----------|----------|----------|
| C                                             | 0.58654  | -3.72065 | 1.66014  | N | 2.42319  | -1.26773 | 0.55067  |
| H                                             | 1.00895  | -2.69528 | 1.63747  | C | 3.41935  | 2.76551  | 2.53963  |
| C                                             | 0.24483  | -4.04696 | 3.12639  | H | 4.51156  | 2.65254  | 2.62181  |
| H                                             | -0.57982 | -3.42595 | 3.51186  | H | 3.01901  | 2.83076  | 3.56654  |
| H                                             | 1.12614  | -3.86753 | 3.76435  | H | 3.19381  | 3.71442  | 2.03289  |
| H                                             | -0.03540 | -5.10843 | 3.25168  | C | 2.80959  | 1.56655  | 1.81998  |
| C                                             | 1.69484  | -4.68450 | 1.17059  | C | 3.43976  | 0.32932  | 2.10780  |
| H                                             | 1.31683  | -5.72180 | 1.13764  | H | 4.23171  | 0.39907  | 2.85858  |
| H                                             | 2.55694  | -4.65918 | 1.86024  | C | 3.33901  | -0.93975 | 1.48867  |
| H                                             | 2.05809  | -4.41876 | 0.16694  | C | 4.40056  | -1.95060 | 1.90316  |
| C                                             | -1.87892 | 1.24041  | -0.93446 | H | 4.01202  | -2.97987 | 1.89204  |
| C                                             | -1.86480 | 2.51161  | -1.72049 | H | 4.78406  | -1.71758 | 2.90819  |
| C                                             | -1.20577 | 2.51308  | -2.97108 | H | 5.25652  | -1.92342 | 1.20611  |
| H                                             | -0.73643 | 1.58976  | -3.32345 | C | 2.61217  | -2.50197 | -0.17209 |
| C                                             | -1.17736 | 3.67446  | -3.75388 | C | 3.54731  | -2.54783 | -1.25089 |
| H                                             | -0.68624 | 3.65969  | -4.73222 | C | 3.65729  | -3.73624 | -1.99851 |
| C                                             | -1.77501 | 4.85642  | -3.28166 | H | 4.36299  | -3.77586 | -2.83612 |
| H                                             | -1.74526 | 5.76642  | -3.88990 | C | 2.88954  | -4.86573 | -1.69288 |
| C                                             | -2.40144 | 4.87135  | -2.02410 | H | 2.99330  | -5.78118 | -2.28497 |
| H                                             | -2.84396 | 5.79732  | -1.64274 | C | 1.99375  | -4.81660 | -0.61926 |
| C                                             | -2.45904 | 3.70407  | -1.24846 | H | 1.40362  | -5.70543 | -0.37004 |
| H                                             | -2.91537 | 3.72307  | -0.25373 | C | 1.83132  | -3.64966 | 0.15406  |
| C                                             | -3.12508 | 0.73963  | -0.31638 | C | 0.85900  | -3.66954 | 1.33681  |
| C                                             | -4.39143 | 1.32142  | -0.58508 | H | 0.73635  | -2.63383 | 1.69682  |
| H                                             | -4.46562 | 2.18326  | -1.25237 | C | 1.41829  | -4.51105 | 2.50901  |
| C                                             | -5.55833 | 0.78680  | -0.03239 | H | 1.56853  | -5.56276 | 2.20608  |
| H                                             | -6.54062 | 1.22095  | -0.23546 | H | 0.71429  | -4.50122 | 3.35946  |
| C                                             | -5.45587 | -0.34512 | 0.78748  | H | 2.38688  | -4.12486 | 2.86820  |
| C                                             | -4.22579 | -0.95985 | 1.06222  | C | -0.54217 | -4.18287 | 0.94196  |
| H                                             | -4.18938 | -1.85463 | 1.68784  | H | -0.96363 | -3.59748 | 0.10782  |
| C                                             | -3.06925 | -0.41579 | 0.50536  | H | -1.23478 | -4.09493 | 1.79537  |
| H                                             | -2.10243 | -0.88656 | 0.69901  | H | -0.52166 | -5.24306 | 0.63306  |
| C                                             | 0.30593  | -0.50245 | 4.02112  | C | 4.42891  | -1.35191 | -1.63147 |
| H                                             | -0.56860 | -1.17190 | 3.95895  | H | 4.29985  | -0.57424 | -0.85968 |
| H                                             | 0.23089  | 0.06671  | 4.96522  | C | 4.00548  | -0.73367 | -2.98420 |
| H                                             | 1.20139  | -1.14453 | 4.08389  | H | 4.07262  | -1.47443 | -3.80036 |
| C                                             | -1.14411 | 1.82464  | 2.71217  | H | 4.66166  | 0.11564  | -3.24524 |
| C                                             | -1.13815 | 3.17719  | 2.29154  | H | 2.96709  | -0.36308 | -2.95662 |
| H                                             | -0.23134 | 3.59665  | 1.83950  | C | 5.92871  | -1.72722 | -1.67462 |
| C                                             | -2.25097 | 4.01862  | 2.46831  | H | 6.26288  | -2.19992 | -0.73560 |
| H                                             | -2.19835 | 5.06662  | 2.14917  | H | 6.54570  | -0.82737 | -1.84282 |
| C                                             | -3.41952 | 3.52419  | 3.07123  | H | 6.14695  | -2.43401 | -2.49438 |
| H                                             | -4.28744 | 4.17668  | 3.21813  | C | 1.26185  | 3.04896  | 0.71295  |
| C                                             | -3.45493 | 2.18664  | 3.50053  | C | 1.60847  | 3.65874  | -0.53380 |
| H                                             | -4.35499 | 1.79104  | 3.98551  | C | 1.05887  | 4.91719  | -0.84549 |
| C                                             | -2.33512 | 1.35851  | 3.32189  | H | 1.31700  | 5.39512  | -1.79510 |
| H                                             | -2.38770 | 0.32336  | 3.67968  | C | 0.18995  | 5.57331  | 0.03630  |
| Si                                            | 0.42361  | 0.70050  | 2.51016  | H | -0.23065 | 6.54898  | -0.22892 |
| C                                             | 1.87081  | 1.89450  | 2.97665  | C | -0.13064 | 4.97509  | 1.25771  |
| H                                             | 1.67392  | 2.37713  | 3.95097  | H | -0.80405 | 5.49226  | 1.95020  |
| H                                             | 2.82393  | 1.34526  | 3.04810  | C | 0.39328  | 3.71911  | 1.62674  |
| H                                             | 2.02172  | 2.68533  | 2.22367  | C | 0.02016  | 3.15142  | 3.00076  |
| F                                             | -6.58324 | -0.87157 | 1.31609  | H | 0.54411  | 2.18762  | 3.12384  |
| <b>TS (B-C)</b>                               |          |          |          | C | 0.46868  | 4.09588  | 4.14319  |
| SCF (BP86) Energy = -2231.44335686            |          |          |          | H | 1.53737  | 4.35660  | 4.07778  |
| Enthalpy 0K = -2230.484775                    |          |          |          | H | 0.28805  | 3.62349  | 5.12465  |
| Enthalpy 298K = -2230.422564                  |          |          |          | H | -0.10260 | 5.04066  | 4.12278  |
| Free Energy 298K = -2230.582452               |          |          |          | C | -1.49573 | 2.87983  | 3.13009  |
| Lowest Frequency = -175.5360 cm <sup>-1</sup> |          |          |          | H | -2.07736 | 3.81239  | 3.02284  |
| Second Frequency = 13.5463 cm <sup>-1</sup>   |          |          |          | H | -1.72404 | 2.45899  | 4.12519  |
| SCF (BP86-D3BJ) Energy = -2231.76676459       |          |          |          | H | -1.85704 | 2.17114  | 2.36976  |
| SCF (C6H6) Energy = -2231.44952066            |          |          |          | C | 2.59812  | 2.99053  | -1.49431 |
| SCF (BS2) Energy = -2716.86350727             |          |          |          | H | 2.40283  | 1.90002  | -1.46038 |
|                                               |          |          |          | C | 2.45595  | 3.45332  | -2.95803 |
| Mg                                            | 0.77373  | -0.01635 | 0.33318  | H | 1.41478  | 3.39919  | -3.31446 |
| O                                             | -0.75381 | -0.55558 | 1.40203  | H | 3.07517  | 2.81738  | -3.61348 |
| N                                             | 1.75504  | 1.72019  | 0.99041  | H | 2.80931  | 4.49126  | -3.09255 |
|                                               |          |          |          | C | 4.06231  | 3.19967  | -1.03559 |

|                                            |          |          |          |   |          |          |          |
|--------------------------------------------|----------|----------|----------|---|----------|----------|----------|
| H                                          | 4.30134  | 4.27692  | -0.98871 | H | -5.14579 | -0.74852 | -2.06741 |
| H                                          | 4.75959  | 2.72859  | -1.75085 | C | -4.06574 | 0.54637  | -0.78996 |
| H                                          | 4.25233  | 2.76212  | -0.04411 | C | -5.31667 | 1.40656  | -0.69871 |
| C                                          | -2.05340 | -0.45057 | 1.34465  | H | -5.47819 | 1.78072  | 0.32399  |
| C                                          | -2.81555 | -1.40743 | 2.20046  | H | -6.20427 | 0.84500  | -1.02546 |
| C                                          | -2.33606 | -1.66285 | 3.50728  | H | -5.22112 | 2.29514  | -1.34758 |
| H                                          | -1.44475 | -1.13016 | 3.85182  | C | -2.93774 | 2.19597  | 0.55635  |
| C                                          | -2.99127 | -2.57274 | 4.34653  | C | -2.63416 | 3.37581  | -0.18547 |
| H                                          | -2.61504 | -2.74490 | 5.36074  | C | -2.59139 | 4.60828  | 0.49380  |
| C                                          | -4.12674 | -3.26477 | 3.88964  | H | -2.35415 | 5.51903  | -0.06744 |
| H                                          | -4.63701 | -3.97935 | 4.54401  | C | -2.84520 | 4.69275  | 1.86738  |
| C                                          | -4.59335 | -3.04458 | 2.58374  | H | -2.81469 | 5.66192  | 2.37616  |
| H                                          | -5.45933 | -3.60109 | 2.20950  | C | -3.12914 | 3.52708  | 2.58637  |
| C                                          | -3.94569 | -2.12558 | 1.74388  | H | -3.31970 | 3.59168  | 3.66311  |
| H                                          | -4.28758 | -1.99707 | 0.71231  | C | -3.17252 | 2.26569  | 1.95962  |
| C                                          | -2.64350 | 0.51782  | 0.48579  | C | -3.47835 | 1.02806  | 2.80527  |
| C                                          | -4.05694 | 0.72071  | 0.36324  | H | -3.32070 | 0.13865  | 2.16751  |
| H                                          | -4.73173 | 0.12277  | 0.98007  | C | -4.95266 | 1.00473  | 3.27305  |
| C                                          | -4.58886 | 1.67278  | -0.48271 | H | -5.17881 | 1.87948  | 3.90814  |
| H                                          | -5.66568 | 1.82932  | -0.57738 | H | -5.15450 | 0.09656  | 3.86743  |
| C                                          | -3.69383 | 2.50216  | -1.22166 | H | -5.65670 | 1.01679  | 2.42401  |
| C                                          | -2.32599 | 2.40979  | -1.11877 | C | -2.52770 | 0.91295  | 4.01639  |
| H                                          | -1.69061 | 3.16273  | -1.59059 | H | -1.47209 | 0.92116  | 3.70164  |
| C                                          | -1.73779 | 1.34641  | -0.33159 | H | -2.70756 | -0.03041 | 4.55770  |
| H                                          | -0.81152 | 1.66330  | 0.16052  | H | -2.67816 | 1.74314  | 4.72875  |
| C                                          | -0.44121 | 1.08805  | -3.59794 | C | -2.31437 | 3.34229  | -1.68228 |
| H                                          | -0.91936 | 2.07635  | -3.50930 | H | -2.51867 | 2.32167  | -2.05040 |
| H                                          | -0.72824 | 0.65928  | -4.57468 | C | -0.81592 | 3.63697  | -1.92592 |
| H                                          | 0.65139  | 1.23395  | -3.60556 | H | -0.54808 | 4.64522  | -1.56439 |
| C                                          | -2.70769 | -0.74813 | -2.58273 | H | -0.57471 | 3.58861  | -3.00214 |
| C                                          | -3.18527 | -1.96608 | -2.04134 | H | -0.16811 | 2.91507  | -1.39921 |
| H                                          | -2.54286 | -2.55373 | -1.37435 | C | -3.19181 | 4.31694  | -2.49967 |
| C                                          | -4.46611 | -2.45432 | -2.34558 | H | -4.26764 | 4.13561  | -2.33622 |
| H                                          | -4.80375 | -3.40581 | -1.91885 | H | -2.98770 | 4.20594  | -3.57876 |
| C                                          | -5.30791 | -1.73006 | -3.20677 | H | -2.98925 | 5.36874  | -2.23230 |
| H                                          | -6.30625 | -2.10990 | -3.45025 | C | -0.91246 | -2.30197 | -2.40669 |
| C                                          | -4.85562 | -0.52307 | -3.76170 | C | -0.22448 | -1.75395 | -3.52861 |
| H                                          | -5.50173 | 0.04539  | -4.44015 | C | 0.72381  | -2.55238 | -4.19616 |
| C                                          | -3.57247 | -0.04113 | -3.45133 | H | 1.25878  | -2.13709 | -5.05759 |
| H                                          | -3.24003 | 0.90167  | -3.89938 | C | 0.99904  | -3.85943 | -3.77972 |
| Si                                         | -0.93870 | -0.12498 | -2.19979 | H | 1.73670  | -4.46629 | -4.31488 |
| C                                          | 0.12416  | -1.71784 | -2.53434 | C | 0.33525  | -4.37796 | -2.66314 |
| H                                          | -0.08200 | -2.03977 | -3.57239 | H | 0.56308  | -5.39502 | -2.32563 |
| H                                          | 1.20891  | -1.55405 | -2.43896 | C | -0.61685 | -3.61964 | -1.95353 |
| H                                          | -0.13959 | -2.55226 | -1.86548 | C | -1.28014 | -4.23616 | -0.72044 |
| F                                          | -4.24211 | 3.48953  | -1.97784 | H | -1.92934 | -3.46093 | -0.27168 |
| <b>C</b>                                   |          |          |          | C | -2.18183 | -5.43940 | -1.08239 |
| SCF (BP86) Energy = -2231.47753691         |          |          |          | H | -2.98164 | -5.16059 | -1.78900 |
| Enthalpy 0K = -2230.519648                 |          |          |          | H | -2.65974 | -5.85074 | -0.17610 |
| Enthalpy 298K = -2230.456233               |          |          |          | H | -1.59298 | -6.24972 | -1.54697 |
| Free Energy 298K = -2230.624550            |          |          |          | C | -0.22629 | -4.65359 | 0.33102  |
| Lowest Frequency = 8.2068 cm <sup>-1</sup> |          |          |          | H | 0.40873  | -5.47377 | -0.04694 |
| Second Frequency = 9.9955 cm <sup>-1</sup> |          |          |          | H | -0.71720 | -5.01097 | 1.25240  |
| SCF (BP86-D3BJ) Energy = -2231.77826819    |          |          |          | H | 0.43749  | -3.81559 | 0.60005  |
| SCF (C6H6) Energy = -2231.48818206         |          |          |          | C | -0.44770 | -0.31598 | -4.00303 |
| SCF (BS2) Energy = -2716.90095009          |          |          |          | H | -1.27209 | 0.11224  | -3.40536 |
|                                            |          |          |          | C | 0.81452  | 0.54124  | -3.75017 |
| Mg                                         | -1.32850 | -0.30853 | -0.12879 | H | 1.10702  | 0.53230  | -2.68590 |
| O                                          | 0.21905  | -0.38605 | 0.87921  | H | 0.64587  | 1.58984  | -4.05054 |
| N                                          | -1.87489 | -1.48365 | -1.69951 | H | 1.67558  | 0.16070  | -4.32645 |
| N                                          | -2.95087 | 0.91666  | -0.11887 | C | -0.86434 | -0.24034 | -5.48906 |
| C                                          | -3.57625 | -2.38643 | -3.26652 | H | -0.06647 | -0.61631 | -6.15299 |
| H                                          | -3.15616 | -2.03442 | -4.22522 | H | -1.07115 | 0.80446  | -5.77937 |
| H                                          | -4.67107 | -2.41884 | -3.36470 | H | -1.77155 | -0.83490 | -5.69080 |
| H                                          | -3.19401 | -3.40844 | -3.11795 | C | 0.94141  | -1.01393 | 1.81770  |
| C                                          | -3.15408 | -1.46209 | -2.13560 | C | 0.18096  | -1.58569 | 2.96601  |
| C                                          | -4.15446 | -0.58777 | -1.63717 | C | -1.05933 | -2.23678 | 2.75410  |
|                                            |          |          |          | H | -1.42456 | -2.37539 | 1.72874  |

C -1.79994 -2.77151 3.81678  
 H -2.74285 -3.29162 3.61430  
 C -1.33117 -2.65024 5.13654  
 H -1.90795 -3.06492 5.96962  
 C -0.11838 -1.98059 5.37304  
 H 0.24716 -1.85510 6.39814  
 C 0.62261 -1.45220 4.30660  
 H 1.54842 -0.90397 4.50680  
 C 2.32862 -1.11245 1.67779  
 C 3.14760 -1.99443 2.48026  
 H 2.69926 -2.49389 3.34394  
 C 4.43232 -2.32524 2.12287  
 H 5.02468 -3.03644 2.70484  
 C 4.97243 -1.82951 0.87549  
 C 4.30854 -0.95629 0.07938  
 H 4.73077 -0.64914 -0.88115  
 C 3.02343 0.33625 0.56222  
 H 2.31864 -0.18036 -0.27562  
 C 1.89134 2.36362 1.82946  
 H 1.13747 2.50096 1.03819  
 H 2.14659 3.35321 2.24571  
 H 1.42259 1.76402 2.62667  
 C 4.20628 2.46362 -0.25698  
 C 5.54294 2.24467 -0.67314  
 H 6.16226 1.51224 -0.14245  
 C 6.09924 2.94707 -1.75413  
 H 7.13624 2.75719 -2.05304  
 C 5.32962 3.89557 -2.44762  
 H 5.76238 4.44781 -3.28906  
 C 4.00404 4.13520 -2.05193  
 H 3.39862 4.87838 -2.58316  
 C 3.45376 3.42600 -0.97125  
 H 2.41948 3.63549 -0.67388  
 Si 3.45243 1.47813 1.19712  
 C 4.72722 1.37814 2.60625  
 H 5.00818 2.39145 2.93983  
 H 4.31168 0.83137 3.46834  
 H 5.64238 0.85311 2.28927  
 F 6.18018 -2.34512 0.49626

**B'**

SCF (BP86) Energy = -2231.46615583  
 Enthalpy 0K = -2230.506972  
 Enthalpy 298K = -2230.443968  
 Free Energy 298K = -2230.607089  
 Lowest Frequency = 9.5308 cm<sup>-1</sup>  
 Second Frequency = 12.0422 cm<sup>-1</sup>  
 SCF (BP86-D3BJ) Energy = -2231.78456828  
 SCF (C6H6) Energy = -2231.47196903  
 SCF (BS2) Energy = -2716.88491445

Mg 0.83320 -0.04761 -0.00718  
 O -1.12715 -0.15008 -0.63726  
 N 1.68743 -1.67534 -1.10511  
 N 2.06874 1.38420 -0.94839  
 C 3.06610 -2.61613 -2.97758  
 H 4.14410 -2.44761 -3.13515  
 H 2.60155 -2.67457 -3.97688  
 H 2.92973 -3.58445 -2.47676  
 C 2.46999 -1.45707 -2.18001  
 C 2.85204 -0.17859 -2.66142  
 H 3.44622 -0.21043 -3.57990  
 C 2.75530 1.10590 -2.07668  
 C 3.56391 2.19367 -2.77912  
 H 3.12870 3.19338 -2.63464  
 H 3.63506 1.98077 -3.85757  
 H 4.59440 2.22925 -2.38366  
 C 2.32352 2.64725 -0.30689

C 3.54361 2.84547 0.40874  
 C 3.75239 4.07589 1.06146  
 H 4.68253 4.23348 1.61882  
 C 2.79819 5.09746 1.01675  
 H 2.98163 6.04839 1.52808  
 C 1.60143 4.89126 0.31999  
 H 0.85522 5.69122 0.29273  
 C 1.33602 3.67656 -0.34215  
 C 0.02561 3.49091 -1.11199  
 H -0.25865 2.42422 -1.02763  
 C 0.20155 3.79419 -2.61912  
 H 0.55258 4.83087 -2.76864  
 H -0.76128 3.68424 -3.14907  
 H 0.92782 3.11450 -3.09121  
 C -1.14142 4.32757 -0.55015  
 H -1.24257 4.21209 0.54212  
 H -2.08874 4.01351 -1.01959  
 H -1.01529 5.40424 -0.76338  
 C 4.61317 1.75321 0.52568  
 H 4.38130 0.96552 -0.21061  
 C 4.57971 1.09190 1.92296  
 H 4.78727 1.83128 2.71692  
 H 5.34090 0.29447 1.99592  
 H 3.59257 0.64557 2.13077  
 C 6.03513 2.27420 0.21735  
 H 6.08373 2.78634 -0.75879  
 H 6.75403 1.43656 0.20047  
 H 6.38530 2.98864 0.98300  
 C 1.35570 -3.02220 -0.71869  
 C 1.94262 -3.55728 0.47306  
 C 1.52668 -4.82391 0.92494  
 H 1.96704 -5.23857 1.83632  
 C 0.56908 -5.57173 0.22753  
 H 0.25920 -6.55483 0.59798  
 C 0.03101 -5.06042 -0.95626  
 H -0.70063 -5.65483 -1.51540  
 C 0.40775 -3.79764 -1.45739  
 C -0.19654 -3.34597 -2.79270  
 H 0.21842 -2.35308 -3.03634  
 C 0.16926 -4.32203 -3.93852  
 H 1.25454 -4.49158 -4.01633  
 H -0.18851 -3.93005 -4.90713  
 H -0.30867 -5.30570 -3.78501  
 C -1.73260 -3.20463 -2.72672  
 H -2.21504 -4.17474 -2.51332  
 H -2.12781 -2.84330 -3.69288  
 H -2.04047 -2.50244 -1.94019  
 C 3.05836 -2.80619 1.20777  
 H 2.77481 -1.73457 1.23793  
 C 3.27715 -3.26976 2.66068  
 H 2.34338 -3.26912 3.24514  
 H 3.99001 -2.59449 3.16352  
 H 3.71152 -4.28489 2.70247  
 C 4.39816 -2.90315 0.43774  
 H 4.71072 -3.95802 0.33965  
 H 5.19314 -2.36286 0.98159  
 H 4.32674 -2.47057 -0.57107  
 C -2.38379 -0.22925 -0.52801  
 C -3.21931 0.80526 -1.20056  
 C -2.78747 1.30421 -2.45234  
 H -1.86110 0.91630 -2.88513  
 C -3.54066 2.25966 -3.14234  
 H -3.23543 2.63456 -4.12277  
 C -4.71767 2.74041 -2.55095  
 C -5.15712 2.29403 -1.29752  
 H -6.06600 2.71703 -0.86159  
 C -4.40896 1.31703 -0.62961  
 H -4.71630 0.98578 0.36628

C -3.00685 -1.37516 0.17981  
 C -4.36566 -1.73218 -0.01301  
 H -4.99391 -1.14479 -0.68738  
 C -4.89851 -2.86230 0.61931  
 H -5.94628 -3.13276 0.45390  
 C -2.73509 -3.31712 1.63840  
 H -2.09577 -3.93777 2.27304  
 C -2.19680 -2.19514 1.00342  
 H -1.14403 -1.93319 1.14176  
 C 0.90967 -0.76890 3.93964  
 H 0.51561 -1.78650 3.77259  
 H 0.61929 -0.45318 4.95840  
 H 2.01054 -0.83653 3.91265  
 C -1.60590 0.68381 3.01222  
 C -2.34761 1.76501 2.47751  
 H -1.85219 2.47388 1.80216  
 C -3.69801 1.97678 2.80527  
 H -4.23065 2.84186 2.39231  
 C -4.35980 1.08912 3.67057  
 H -5.41126 1.25064 3.93348  
 C -3.65333 -0.00121 4.20506  
 H -4.15592 -0.69805 4.88610  
 C -2.30029 -0.19379 3.88029  
 H -1.76975 -1.04307 4.32634  
 Si 0.28183 0.49409 2.61688  
 C 0.98819 2.19422 3.20989  
 H 0.71557 2.37361 4.26549  
 H 2.08635 2.22834 3.12370  
 H 0.59472 3.02867 2.60637  
 C -4.08749 -3.65396 1.44925  
 H -4.50504 -4.54039 1.93833  
 F -5.44971 3.66722 -3.20992

**TS (B-C)'**

SCF (BP86) Energy = -2231.44155777  
 Enthalpy 0K = -2230.483057  
 Enthalpy 298K = -2230.420828  
 Free Energy 298K = -2230.581127  
 Lowest Frequency = -180.3813 cm<sup>-1</sup>  
 Second Frequency = 14.1351 cm<sup>-1</sup>  
 SCF (BP86-D3BJ) Energy = -2231.76460051  
 SCF (C6H6) Energy = -2231.44765131  
 SCF (BS2) Energy = -2716.86115891

Mg 0.73011 0.18117 -0.32083  
 O -1.02823 0.04700 -1.12798  
 N 2.21172 -1.03890 -1.17480  
 N 1.70032 1.97867 -0.72951  
 C 3.91353 -1.37617 -2.97813  
 H 4.83743 -0.83265 -3.22949  
 H 3.42086 -1.64279 -3.92954  
 H 4.17600 -2.31275 -2.46606  
 C 2.98768 -0.50001 -2.14015  
 C 3.02602 0.87778 -2.47275  
 H 3.66247 1.10965 -3.33117  
 C 2.52284 2.01773 -1.80078  
 C 3.02657 3.35538 -2.32810  
 H 2.27748 4.15203 -2.20802  
 H 3.30129 3.27168 -3.39074  
 H 3.92809 3.67592 -1.77686  
 C 1.49294 3.20290 0.00496  
 C 2.48392 3.63952 0.93646  
 C 2.22650 4.79140 1.70479  
 H 2.97578 5.12635 2.43115  
 C 1.03934 5.51777 1.55804  
 H 0.86089 6.41300 2.16307  
 C 0.08603 5.09378 0.62582  
 H -0.83660 5.67103 0.49979

C 0.28346 3.94019 -0.15929  
 C -0.78144 3.54639 -1.18670  
 H -0.54332 2.53396 -1.55514  
 C -0.76941 4.50421 -2.40218  
 H -0.99393 5.54050 -2.09227  
 H -1.53187 4.19925 -3.14021  
 H 0.20885 4.51168 -2.91119  
 C -2.19854 3.48694 -0.57778  
 H -2.23277 2.81320 0.29451  
 H -2.91715 3.10694 -1.32285  
 H -2.54980 4.48123 -0.24951  
 C 3.81255 2.90008 1.13733  
 H 3.88639 2.11592 0.36484  
 C 3.87824 2.19854 2.51389  
 H 3.76780 2.92482 3.33831  
 H 4.84904 1.68766 2.64301  
 H 3.08160 1.44422 2.62649  
 C 5.02982 3.83979 0.97140  
 H 5.00333 4.38375 0.01214  
 H 5.96985 3.26231 1.01127  
 H 5.07269 4.59450 1.77624  
 C 2.33530 -2.44647 -0.87647  
 C 3.07076 -2.83440 0.28740  
 C 3.12795 -4.20001 0.62601  
 H 3.68996 -4.51009 1.51198  
 C 2.48290 -5.17213 -0.14979  
 H 2.53653 -6.22842 0.13427  
 C 1.77555 -4.78321 -1.29037  
 H 1.27617 -5.54446 -1.90000  
 C 1.68884 -3.43165 -1.68251  
 C 0.92155 -3.09510 -2.96596  
 H 0.99582 -2.00597 -3.13009  
 C 1.53090 -3.81288 -4.19543  
 H 2.61268 -3.62852 -4.29673  
 H 1.03481 -3.47445 -5.12191  
 H 1.38834 -4.90574 -4.12681  
 C -0.57860 -3.45132 -2.85985  
 H -0.71926 -4.53485 -2.69967  
 H -1.10105 -3.18348 -3.79519  
 H -1.07308 -2.92419 -2.03013  
 C 3.82776 -1.79969 1.12664  
 H 3.20496 -0.88316 1.15616  
 C 4.08604 -2.24460 2.57993  
 H 3.17091 -2.60843 3.07427  
 H 4.47816 -1.39670 3.16711  
 H 4.84361 -3.04695 2.63131  
 C 5.17327 -1.40864 0.46756  
 H 5.81858 -2.29753 0.35226  
 H 5.71151 -0.67847 1.09754  
 H 5.03190 -0.95548 -0.52507  
 C -2.15342 -0.57482 -0.89311  
 C -3.34896 -0.02370 -1.59350  
 C -3.20032 0.40144 -2.93603  
 H -2.22622 0.28311 -3.41900  
 C -4.27063 0.95778 -3.64554  
 H -4.16757 1.27208 -4.68787  
 C -5.50134 1.11157 -2.99389  
 C -5.68000 0.73546 -1.65803  
 H -6.64626 0.90233 -1.17411  
 C -4.60117 0.17025 -0.96310  
 H -4.71944 -0.07830 0.09561  
 C -2.17221 -1.68035 0.00302  
 C -3.34675 -2.43881 0.32265  
 H -4.28829 -2.18600 -0.17087  
 C -3.30649 -3.50384 1.20101  
 H -4.21667 -4.07024 1.41926  
 C -0.89333 -3.23703 1.48036  
 H 0.07082 -3.61905 1.82913

C -0.90295 -2.04954 0.65033  
 H -0.00516 -1.96870 0.02663  
 C 0.60049 -1.21690 3.73983  
 H 0.51820 -2.31463 3.70261  
 H 0.31219 -0.88849 4.75441  
 H 1.65846 -0.94608 3.58937  
 C -2.30907 -0.41733 3.07285  
 C -3.28415 0.50177 2.61570  
 H -3.01042 1.26003 1.87208  
 C -4.60185 0.47850 3.10028  
 H -5.33138 1.21049 2.73501  
 C -4.97969 -0.47297 4.06287  
 H -6.00538 -0.49122 4.44742  
 C -4.02993 -1.39095 4.53695  
 H -4.31307 -2.13125 5.29386  
 C -2.71375 -1.36144 4.04595  
 H -1.98834 -2.08495 4.43323  
 Si -0.50260 -0.32917 2.44734  
 C -0.09609 1.55754 2.67965  
 H -0.27450 1.80362 3.74338  
 H 0.94689 1.81800 2.44127  
 H -0.74311 2.20887 2.07120  
 C -2.06162 -3.90396 1.78476  
 H -2.02733 -4.79798 2.41780  
 F -6.54400 1.65345 -3.67315

**C'**

SCF (BP86) Energy = -2231.47490414  
 Enthalpy 0K = -2230.517163  
 Enthalpy 298K = -2230.453771  
 Free Energy 298K = -2230.622944  
 Lowest Frequency = 4.1124 cm<sup>-1</sup>  
 Second Frequency = 9.2093 cm<sup>-1</sup>  
 SCF (BP86-D3BJ) Energy = -2231.77554362  
 SCF (C6H6) Energy = -2231.48550318  
 SCF (BS2) Energy = -2716.89804836

Mg 1.41858 0.08366 -0.21160  
 O -0.40356 0.02198 -0.43075  
 N 2.82766 -1.36807 -0.44277  
 N 2.67836 1.61584 0.22977  
 C 5.15930 -2.09561 -0.89335  
 H 6.09689 -1.65574 -1.26351  
 H 4.79132 -2.83486 -1.62192  
 H 5.38705 -2.65509 0.03114  
 C 4.12175 -1.01856 -0.61838  
 C 4.61186 0.30954 -0.52184  
 H 5.67675 0.41244 -0.74303  
 C 3.99448 1.50000 -0.06002  
 C 4.91283 2.69322 0.15035  
 H 4.46940 3.61717 -0.25355  
 H 5.89299 2.52658 -0.31946  
 H 5.07474 2.87118 1.22792  
 C 2.20684 2.83067 0.85785  
 C 2.27382 2.95487 2.27705  
 C 1.77263 4.12597 2.87686  
 H 1.81674 4.22801 3.96706  
 C 1.22100 5.15885 2.11044  
 H 0.84166 6.06440 2.59534  
 C 1.15109 5.02058 0.72032  
 H 0.71200 5.82521 0.12015  
 C 1.62932 3.86623 0.06894  
 C 1.50592 3.77136 -1.45305  
 H 1.87973 2.77652 -1.75778  
 C 2.37390 4.83199 -2.16962  
 H 2.04818 5.85440 -1.90908  
 H 2.28902 4.72320 -3.26486  
 H 3.44062 4.74378 -1.90214

C 0.03287 3.88389 -1.90442  
 H -0.59220 3.11067 -1.43021  
 H -0.04839 3.75715 -2.99689  
 H -0.38977 4.87109 -1.64769  
 C 2.83986 1.84734 3.16986  
 H 3.26665 1.06893 2.51329  
 C 1.71794 1.19159 4.00806  
 H 1.24211 1.92718 4.67971  
 H 2.11942 0.37459 4.63282  
 H 0.92361 0.77220 3.36654  
 C 3.97293 2.35186 4.09182  
 H 4.78855 2.82361 3.51803  
 H 4.40302 1.51423 4.66801  
 H 3.60418 3.09749 4.81762  
 C 2.48680 -2.77317 -0.39356  
 C 2.59684 -3.47543 0.84255  
 C 2.24094 -4.83699 0.88057  
 H 2.32045 -5.38313 1.82728  
 C 1.78580 -5.50345 -0.26256  
 H 1.51938 -6.56440 -0.21452  
 C 1.65957 -4.79831 -1.46380  
 H 1.28790 -5.31560 -2.35500  
 C 1.99325 -3.43243 -1.55562  
 C 1.80744 -2.71463 -2.89387  
 H 2.02328 -1.64215 -2.72686  
 C 2.80201 -3.22100 -3.96466  
 H 3.85106 -3.08594 -3.65157  
 H 2.65915 -2.67594 -4.91409  
 H 2.64920 -4.29536 -4.16887  
 C 0.35414 -2.84098 -3.40464  
 H 0.10464 -3.88963 -3.64300  
 H 0.21497 -2.25094 -4.32655  
 H -0.37436 -2.48510 -2.65749  
 C 3.03913 -2.78724 2.13633  
 H 3.37044 -1.76560 1.87990  
 C 1.84832 -2.66296 3.11566  
 H 1.00462 -2.11571 2.65985  
 H 2.14733 -2.13019 4.03520  
 H 1.47110 -3.65824 3.40865  
 C 4.22546 -3.50441 2.81833  
 H 3.94884 -4.51927 3.15340  
 H 4.55622 -2.94169 3.70857  
 H 5.08896 -3.60375 2.13896  
 C -1.55717 -0.20835 -1.07974  
 C -1.70669 0.46999 -2.39884  
 C -0.60933 0.56108 -3.28962  
 H 0.33899 0.08507 -3.01737  
 C -0.71046 1.20969 -4.52719  
 H 0.13383 1.25849 -5.22106  
 C -1.92962 1.80256 -4.87756  
 C -3.03351 1.76572 -4.01789  
 H -3.96267 2.26355 -4.30951  
 C -2.91249 1.10750 -2.78642  
 H -3.76138 1.10288 -2.09604  
 C -2.52998 -1.03534 -0.51716  
 C -3.66667 -1.55307 -1.24965  
 H -3.86842 -1.16492 -2.25233  
 C -4.41895 -2.60307 -0.78212  
 H -5.24191 -2.99400 -1.38916  
 C -3.04705 -2.81391 1.22709  
 H -2.73293 -3.35734 2.12597  
 C -2.37869 -1.50238 0.92612  
 H -1.30756 -1.52148 1.20890  
 C -2.83972 -0.76031 3.93619  
 H -3.36670 -1.70488 4.14968  
 H -3.19170 -0.00679 4.66094  
 H -1.76351 -0.92775 4.11716  
 C -5.01543 0.04856 1.86775

C -5.52442 1.16604 1.16399  
H -4.83282 1.92058 0.77141  
C -6.90302 1.33869 0.95989  
H -7.26936 2.21463 0.41262  
C -7.81050 0.39143 1.46046  
H -8.88697 0.52384 1.30531  
C -7.33049 -0.72462 2.16492  
H -8.03281 -1.46707 2.56041  
C -5.95092 -0.89014 2.36520  
H -5.59701 -1.77014 2.91329  
Si -3.14286 -0.16204 2.14820  
C -2.29236 1.52108 1.89308  
H -2.80161 2.30808 2.47530  
H -1.24046 1.48084 2.22000  
H -2.29516 1.81261 0.83065  
C -4.05775 -3.28663 0.44752  
H -4.57245 -4.21804 0.71018  
F -2.03759 2.44010 -6.07402

**4'**

SCF (BP86) Energy = -2907.36365593  
Enthalpy 0K = -2906.226430  
Enthalpy 298K = -2906.149690  
Free Energy 298K = -2906.345533  
Lowest Frequency = 10.4427 cm<sup>-1</sup>  
Second Frequency = 11.7701 cm<sup>-1</sup>  
SCF (BP86-D3BJ) Energy = -2907.76196768  
SCF (C6H6) Energy = -2907.36974043  
SCF (BS2) Energy = -3392.96320765

Mg -1.17195 0.15218 0.24592  
O 0.26139 1.36625 -0.18580  
N -2.15134 0.66134 2.04091  
N -2.93881 -0.17815 -0.81020  
C -4.11616 1.66016 3.21893  
H -4.69223 0.83980 3.68303  
H -4.83438 2.45346 2.95832  
H -3.41737 2.03830 3.97861  
C -3.40523 1.15369 1.96844  
C -4.18866 1.19752 0.78243  
H -5.14077 1.72248 0.89588  
C -4.04124 0.51611 -0.45112  
C -5.22567 0.60446 -1.40482  
H -4.97300 1.26023 -2.25689  
H -6.11406 1.01828 -0.90556  
H -5.48102 -0.37905 -1.82966  
C -3.03205 -1.06650 -1.94277  
C -3.41731 -2.42577 -1.71891  
C -3.50584 -3.29720 -2.82260  
H -3.81706 -4.33457 -2.66013  
C -3.20236 -2.86666 -4.12061  
H -3.28366 -3.55846 -4.96617  
C -2.79865 -1.54308 -4.32477  
H -2.55374 -1.20386 -5.33764  
C -2.71129 -0.62459 -3.25893  
C -2.26523 0.80599 -3.55797  
H -2.33275 1.38551 -2.62096  
C -3.16501 1.49615 -4.60859  
H -3.07922 1.01082 -5.59716  
H -2.86742 2.55170 -4.72817  
H -4.22984 1.47219 -4.32119  
C -0.79130 0.83168 -4.01913  
H -0.12890 0.38677 -3.25946  
H -0.46172 1.86980 -4.19471  
H -0.65672 0.26568 -4.95836  
C -3.75376 -2.94848 -0.31940  
H -3.30382 -2.24613 0.40511  
C -3.16457 -4.34983 -0.05041

H -3.64467 -5.12673 -0.67127  
H -3.32766 -4.63441 1.00293  
H -2.08059 -4.38185 -0.24963  
C -5.28045 -2.95919 -0.06835  
H -5.71494 -1.94987 -0.14703  
H -5.50541 -3.34488 0.94187  
H -5.79353 -3.60840 -0.80034  
C -1.55769 0.51843 3.35067  
C -1.88818 -0.60798 4.16097  
C -1.29056 -0.73092 5.43077  
H -1.54105 -1.59596 6.05531  
C -0.39155 0.22656 5.90945  
H 0.05242 0.12079 6.90529  
C -0.06082 1.32129 5.10117  
H 0.64618 2.06892 5.47422  
C -0.61893 1.48927 3.81803  
C -0.23592 2.71094 2.97844  
H -0.31792 2.41340 1.91871  
C -1.20139 3.89786 3.21087  
H -2.23858 3.65068 2.93495  
H -0.89100 4.76647 2.60452  
H -1.19552 4.20437 4.27249  
C 1.21617 3.17667 3.20814  
H 1.35176 3.63900 4.20281  
H 1.49250 3.93196 2.45498  
H 1.93359 2.34406 3.11958  
C -2.84789 -1.70565 3.69536  
H -3.28861 -1.38662 2.73508  
C -2.08481 -3.02638 3.44556  
H -1.30512 -2.90061 2.67704  
H -2.77639 -3.81974 3.11140  
H -1.58993 -3.37868 4.36761  
C -4.00593 -1.93951 4.69236  
H -3.63902 -2.34170 5.65314  
H -4.72447 -2.67074 4.28275  
H -4.55471 -1.00853 4.91280  
C 0.63769 2.56468 -0.60508  
C -0.40617 3.41996 -1.25223  
C -1.71448 3.47591 -0.71436  
H -1.94981 2.92700 0.20350  
C -2.72061 4.24978 -1.30819  
H -3.72529 4.29893 -0.87968  
C -2.41995 4.97116 -2.46938  
C -1.14580 4.92992 -3.04848  
H -0.95034 5.49020 -3.96725  
C -0.15172 4.15147 -2.43850  
H 0.84037 4.09398 -2.89697  
C 1.95433 3.02546 -0.39857  
C 2.32028 4.41676 -0.50193  
H 1.60814 5.11919 -0.94518  
C 3.47640 4.91569 0.06301  
H 3.69070 5.98772 0.00272  
C 4.33513 4.06156 0.85958  
C 4.08978 2.72174 0.93868  
H 4.70760 2.07577 1.57204  
C 3.03510 2.07266 0.09095  
H 2.57798 1.20125 0.59276  
C 2.76127 0.30295 -2.51647  
H 2.24967 -0.48560 -1.94193  
H 3.26773 -0.16093 -3.37990  
H 1.98812 0.98836 -2.89862  
C 5.35843 0.12034 -0.80523  
C 6.56626 0.63490 -0.27246  
H 6.71887 1.71952 -0.22859  
C 7.57862 -0.21366 0.20307  
H 8.50293 0.21238 0.60921  
C 7.40969 -1.60712 0.15200  
H 8.19957 -2.27203 0.51827



|    |          |          |          |   |          |          |          |
|----|----------|----------|----------|---|----------|----------|----------|
| C  | 6.22459  | -2.14175 | -0.37774 | C | 1.71440  | -4.91534 | -3.13267 |
| H  | 6.09006  | -3.22837 | -0.42952 | H | 3.58116  | -5.37329 | -2.14200 |
| C  | 5.21412  | -1.28644 | -0.84794 | H | -0.19141 | -4.29859 | -3.96206 |
| H  | 4.30010  | -1.72610 | -1.26434 | C | 1.40203  | -2.54013 | 1.53123  |
| Si | 3.98738  | 1.28503  | -1.45057 | C | 1.76655  | -3.79414 | 2.08315  |
| C  | 4.79103  | 2.65479  | -2.49665 | C | 1.59510  | -1.36921 | 2.30545  |
| H  | 5.39163  | 2.20897  | -3.30771 | C | 2.32195  | -3.86757 | 3.36714  |
| H  | 4.02227  | 3.30238  | -2.94821 | H | 1.57205  | -4.71165 | 1.51990  |
| H  | 5.45004  | 3.29428  | -1.88815 | C | 2.16071  | -1.44816 | 3.58182  |
| C  | 0.74250  | -2.42800 | 0.20728  | H | 1.32455  | -0.39710 | 1.88029  |
| O  | -0.15262 | -1.54267 | 0.02878  | C | 2.52746  | -2.69654 | 4.11577  |
| C  | 1.09271  | -3.31893 | -0.91682 | H | 2.58466  | -4.84319 | 3.78893  |
| C  | 2.32037  | -4.03207 | -0.97376 | H | 2.30207  | -0.53455 | 4.16612  |
| C  | 0.20011  | -3.41091 | -2.01851 | F | 2.01303  | -5.69244 | -4.19836 |
| C  | 2.63490  | -4.82981 | -2.07807 | H | 2.96610  | -2.75635 | 5.11711  |
| H  | 3.04559  | -3.93194 | -0.16195 | F | -3.39021 | 5.72126  | -3.05525 |
| C  | 0.49999  | -4.21354 | -3.11995 | H | 5.14742  | 4.51290  | 1.44080  |
| H  | -0.73972 | -2.85292 | -1.98935 |   |          |          |          |
